# Supplementary material for: Castor Plant Adaptation to Salinity Stress during Early Seedling Stage by Physiological and Transcriptomic Methods
Source: MDPI journal article supplement (doi:10.3390/agronomy13030693), 2023-02-27
Supplement: s1 [file s1]

Archive with 2 entries (2 files):
- Supplementary Figure.pdf
- Supplementary Table.pdf
