# Supplementary material for: Castor Plant Adaptation to Salinity Stress during Early Seedling Stage by Physiological and Transcriptomic Methods
Source: MDPI journal article supplement (doi:10.3390/agronomy13030693), 2023-02-27
Supplement: s1 [file s1]

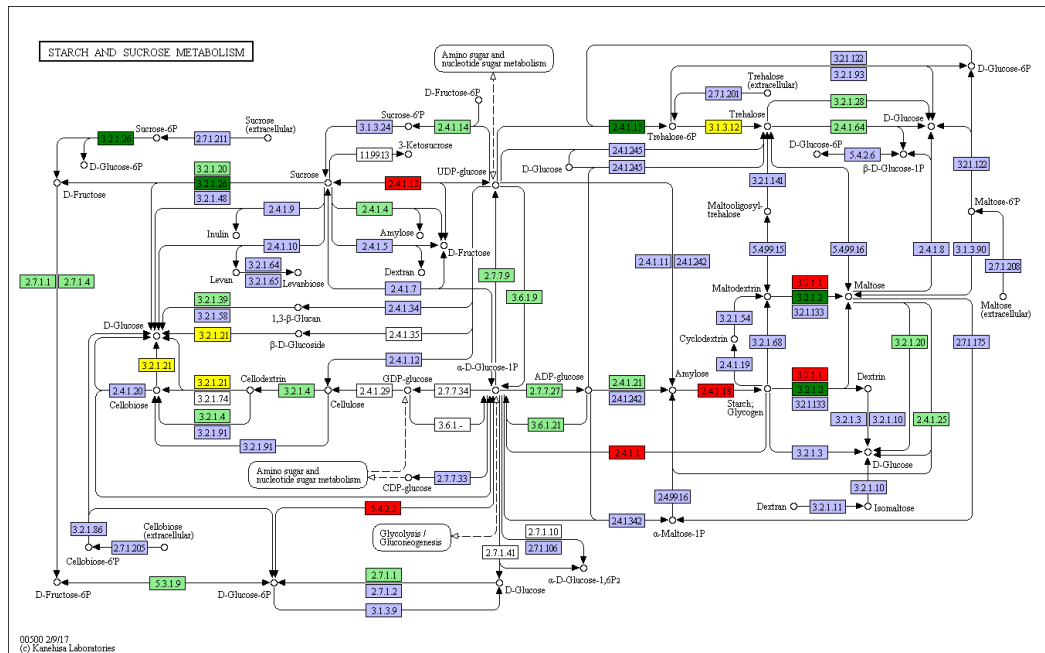

**Figure S1.** Ko00500 (starch and sucrose metabolism) in the cotyledons of castor under salt stress. Red boxes represent up-regulated genes, dark green boxes represent down-regulated genes, and light green and light purple are castor-specific genes.

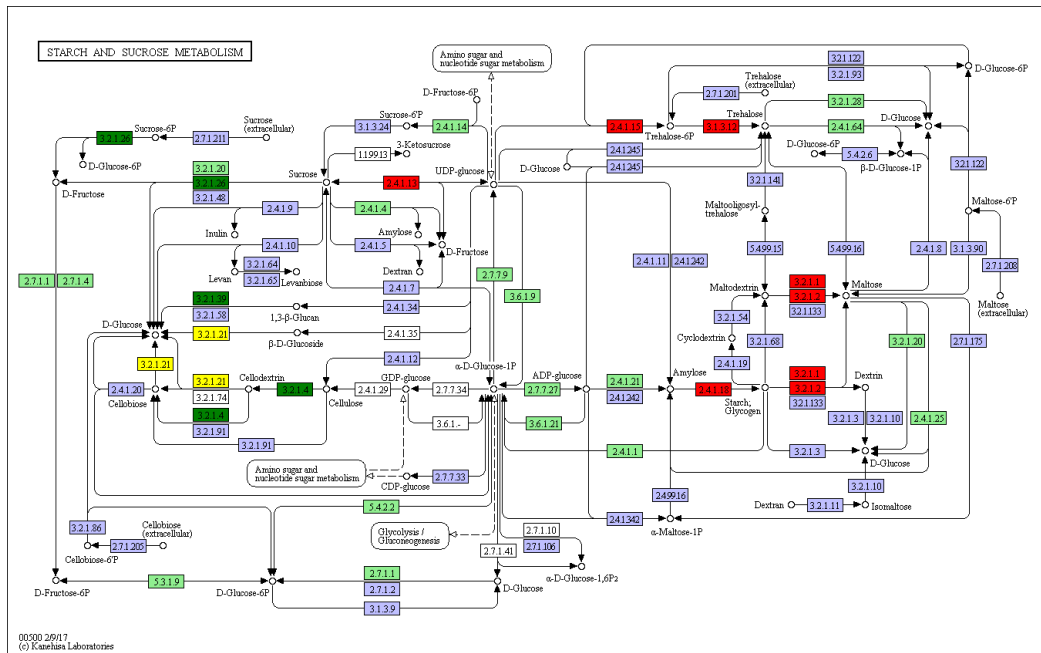

**Figure S2.** Ko00500 (starch and sucrose metabolism) in the roots of castor under salt stress. Red boxes represent up-regulated genes, dark green boxes represent down-regulated genes, and light green and light purple are castor-specific genes.

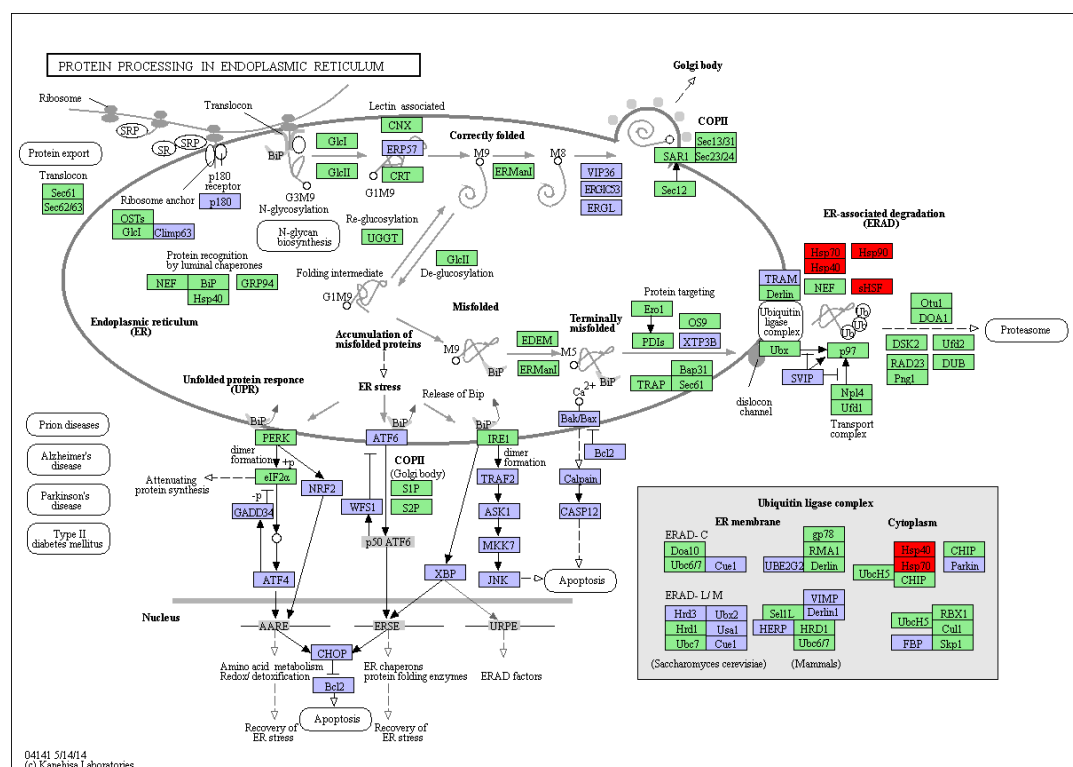

**Figure S3.** Ko04141 (protein processing in endoplasmic reticulum) in the cotyledons of castor under salt stress.

Red boxes represent up-regulated genes, dark green boxes represent down-regulated genes, and light green and light purple are castor-specific genes.
