# Supplementary material for: Castor Plant Adaptation to Salinity Stress during Early Seedling Stage by Physiological and Transcriptomic Methods
Source: MDPI journal article supplement (doi:10.3390/agronomy13030693), 2023-02-27
Supplement: s1 [file s1 › Supplementary Table.pdf]

**Table S1.** 283 DEGs (178 up-regulated and 105 down-regulated) involved in cotyledons of castor under salt stress.

| Gene ID       | FC     | log2FC | pValue  | Regulation | Gene_symbol          | Description                                              |
|---------------|--------|--------|---------|------------|----------------------|----------------------------------------------------------|
| 27504.t000004 | 2.654  | 1.408  | 0.00000 | Up         | <i>Cysteine-rich</i> | cysteine-rich receptor-like protein                      |
|               |        |        |         |            | <i>RLK3</i>          | kinase 3                                                 |
| 27504.t000029 | 2.078  | 1.055  | 0.00018 | Up         | -                    | uncharacterized protein LOC8273499                       |
| 27538.t000015 | 5.958  | 2.575  | 0.00000 | Up         | -                    | ubiquitin-like protein 5                                 |
| 27561.t000009 | 3.660  | 1.872  | 0.00121 | Up         | -                    | UDP-glucuronosyltransferase, putative                    |
| 27766.t000007 | 4.678  | 2.226  | 0.00390 | Up         | -                    | pathogenesis-related protein PR-1                        |
| 27789.t000001 | 2.414  | 1.271  | 0.00783 | Up         | -                    | aldehyde dehydrogenase family 7<br>member B4             |
| 27894.t000028 | 0.388  | -1.368 | 0.00009 | Down       | <i>OsbZIP03</i>      | conserved hypothetical protein                           |
| 27940.t000006 | 4.909  | 2.296  | 0.03419 | Up         | <i>At-EXPR1</i>      | expansin-like B1                                         |
| 27985.t000008 | 2.983  | 1.577  | 0.03568 | Up         | -                    | serine-threonine protein kinase,<br>plant-type, putative |
| 27985.t000009 | 3.521  | 1.816  | 0.00292 | Up         | -                    | serine-threonine protein kinase,<br>plant-type, putative |
| 28152.t000048 | 2.986  | 1.578  | 0.01622 | Up         | -                    | conserved hypothetical protein                           |
| 28180.t000017 | 0.393  | -1.349 | 0.00018 | Down       | <i>Gamma-TIP3</i>    | aquaporin TIP1-3                                         |
| 28196.t000005 | 0.052  | -4.262 | 0.00000 | Down       | -                    | flavonoid 3-hydroxylase, putative                        |
| 28207.t000006 | 8.387  | 3.068  | 0.00000 | Up         | <i>AS2-like</i>      | LOB domain-containing protein,<br>putative               |
| 28219.t000002 | 2.846  | 1.509  | 0.00063 | Up         | <i>ANAC072</i>       | NAC domain-containing protein 72                         |
| 28327.t000015 | 0.238  | -2.070 | 0.00125 | Down       | -                    | Tyrosine-specific transport protein,<br>putative         |
|               |        |        |         |            |                      | ribulose biphosphate                                     |
| 28345.t000005 | 4.800  | 2.263  | 0.00000 | Up         | <i>RA 1</i>          | carboxylase/oxygenase activase 2,<br>chloroplastic       |
| 28345.t000008 | 5.555  | 2.474  | 0.00009 | Up         | -                    | subtilisin inhibitor 1, putative                         |
| 28401.t000005 | 2.294  | 1.198  | 0.00865 | Up         | <i>PPIase</i>        | peptidylprolyl isomerase, putative                       |
|               |        |        |         |            | <i>FKBP65</i>        |                                                          |
| 28623.t000008 | 6.436  | 2.686  | 0.00000 | Up         | -                    | uncharacterized protein LOC8286660                       |
| 28650.t000008 | 0.231  | -2.117 | 0.02431 | Down       | -                    | conserved hypothetical protein                           |
| 28663.t000002 | 2.592  | 1.374  | 0.00070 | Up         | <i>AtNSP2</i>        | nitrile-specifier protein 5                              |
| 28752.t000001 | 0.244  | -2.035 | 0.00982 | Down       | -                    | serine-threonine protein kinase,<br>plant-type, putative |
| 28850.t000001 | 2.256  | 1.174  | 0.02475 | Up         | <i>CER2-like1</i>    | protein ECERIFERUM 26                                    |
| 28872.t000005 | 15.467 | 3.951  | 0.00000 | Up         | -                    | putative glycine-rich cell wall structural<br>protein 1  |
|               |        |        |         |            | ABC                  |                                                          |
| 28927.t000001 | 3.674  | 1.878  | 0.00000 | Up         | transporter          | ATP-binding cassette transporter,<br>putative            |
|               |        |        |         |            | <i>ABCG.25</i>       |                                                          |
| 29044.t000010 | 11.760 | 3.556  | 0.00000 | Up         | <i>LTP</i>           | non-specific lipid-transfer protein 1                    |
| 29485.t000003 | 3.957  | 1.985  | 0.01632 | Up         | -                    | small heat shock protein                                 |

Table S1 (continued)

| Gene ID       | FC     | log2FC | pValue  | Regulation | Gene_symbol     | Description                                                                 |
|---------------|--------|--------|---------|------------|-----------------|-----------------------------------------------------------------------------|
| 29489.t000010 | 0.185  | -2.436 | 0.01466 | Down       | -               | serine-threonine protein kinase,<br>plant-type, putative                    |
| 29589.t000028 | 0.358  | -1.481 | 0.02309 | Down       | -               | protein NUCLEAR FUSION<br>DEFECTIVE 4                                       |
| 29589.t000071 | 4.379  | 2.130  | 0.01748 | Up         | <i>PRCP</i>     | lysosomal Pro-X carboxypeptidase                                            |
| 29596.t000001 | 9.338  | 3.223  | 0.00000 | Up         | -               | uncharacterized protein At5g65660                                           |
| 29601.t000020 | 15.407 | 3.946  | 0.00000 | Up         | -               | protein SLE1 [Ricinus communis]                                             |
| 29610.t000003 | 5.459  | 2.449  | 0.00002 | Up         | -               | 17.3 kDa class I heat shock protein<br>[Ricinus communis]                   |
| 29615.t000004 | 0.027  | -5.197 | 0.00000 | Down       | -               | conserved hypothetical protein [Ricinus<br>communis]                        |
| 29628.t000019 | 0.458  | -1.128 | 0.00221 | Down       | -               | pentatricopeptide repeat-containing<br>protein, putative [Ricinus communis] |
| 29633.t000030 | 19.629 | 4.295  | 0.00440 | Up         | -               | class I heat shock protein [Ricinus<br>communis]                            |
| 29647.t000065 | Inf    | Inf    | 0.01187 | Up         | <i>LEA D-34</i> | late embryogenesis abundant protein<br>D-34 [Ricinus communis]              |
| 29648.t000015 | 2.366  | 1.242  | 0.00002 | Up         | <i>AtFBL5</i>   | F-box protein SKP2A [Ricinus<br>communis]                                   |
| 29656.t000020 | 0.101  | -3.303 | 0.00544 | Down       | -               | protein NUCLEAR FUSION<br>DEFECTIVE 4                                       |
| 29656.t000021 | 0.296  | -1.758 | 0.01183 | Down       | <i>AtOPT7</i>   | Oligopeptide transporter, putative                                          |
| 29661.t000036 | 3.547  | 1.827  | 0.00467 | Up         | -               | conserved hypothetical protein                                              |
| 29665.t000004 | 3.872  | 1.953  | 0.00000 | Up         | -               | secoisolaricresinol dehydrogenase                                           |
| 29666.t000042 | 0.195  | -2.361 | 0.00066 | Down       | -               | polygalacturonase, putative                                                 |
| 29667.t000013 | 2.288  | 1.194  | 0.00003 | Up         | <i>AtOCT7</i>   | sugar transporter, putative                                                 |
| 29678.t000017 | 2.350  | 1.233  | 0.00965 | Up         | -               | UDP-glycosyltransferase 74E2                                                |
| 29681.t000040 | 0.214  | -2.221 | 0.00000 | Down       | -               | ammonium transporter 1 member 3                                             |
| 29682.t000035 | 0.106  | -3.239 | 0.04317 | Down       | -               | uncharacterized protein LOC8288347                                          |
| 29684.t000002 | 0.087  | -3.519 | 0.00000 | Down       | <i>PE 35</i>    | pectinesterase                                                              |
| 29692.t000006 | 3.061  | 1.614  | 0.00000 | Up         | <i>AtPCR2</i>   | protein PLANT CADMIUM<br>RESISTANCE 2                                       |
| 29693.t000012 | 3.086  | 1.626  | 0.00008 | Up         | -               | ornithine aminotransferase,<br>mitochondrial isoform X2                     |
| 29693.t000021 | 8.962  | 3.164  | 0.00000 | Up         | -               | uncharacterized protein LOC8264084                                          |
| 29693.t000022 | 35.148 | 5.135  | 0.00426 | Up         | -               | serine-threonine protein kinase,<br>plant-type, putative                    |
| 29701.t000015 | 2.020  | 1.014  | 0.01148 | Up         | -               | GDSL esterase/lipase CPRD49                                                 |
| 29703.t000027 | 12.467 | 3.640  | 0.00000 | Up         | -               | vicilin-like antimicrobial peptides 2-2                                     |
| 29703.t000080 | 7.700  | 2.945  | 0.00003 | Up         | -               | uncharacterized protein LOC8285864                                          |
| 29724.t000016 | 0.194  | -2.369 | 0.01589 | Down       | -               | PREDICTED: 36.4 kDa proline-rich<br>protein                                 |

Table S1 (continued)

| Gene ID       | FC     | log2FC | pValue  | Regulation | Gene_symbol       | Description                                              |
|---------------|--------|--------|---------|------------|-------------------|----------------------------------------------------------|
| 29724.t000024 | 3.896  | 1.962  | 0.02985 | Up         | <i>FaGT6</i>      | anthocyanidin 3-O-glucosyltransferase<br>6               |
| 29726.t000070 | 0.315  | -1.668 | 0.00131 | Down       | -                 | sugar transporter, putative                              |
| 29726.t000131 | 3.179  | 1.669  | 0.00005 | Up         | <i>AtSRG1</i>     | protein SRG1                                             |
| 29726.t000175 | 0.155  | -2.688 | 0.00003 | Down       | -                 | phyloplanin                                              |
| 29726.t000176 | 5.901  | 2.561  | 0.00000 | Up         | -                 | late embryogenesis abundant protein<br>Lea5 isoform X2   |
| 29726.t000183 | 3.530  | 1.819  | 0.00000 | Up         | -                 | uncharacterized protein LOC8278753                       |
| 29727.t000025 | 0.136  | -2.875 | 0.02270 | Down       | <i>AtGLO4</i>     | peroxisomal (S)-2-hydroxy-acid<br>oxidase GLO4           |
| 29729.t000023 | 0.087  | -3.523 | 0.00000 | Down       | -                 | abscisic acid receptor PYL4                              |
| 29729.t000037 | 2.585  | 1.370  | 0.00013 | Up         | -                 | prephenate dehydrogenase, putative                       |
| 29738.t000053 | 2.815  | 1.493  | 0.00005 | Up         | -                 | plastid-lipid-associated protein,<br>chloroplastic       |
| 29739.t000038 | 0.081  | -3.618 | 0.00408 | Down       | <i>AtMSL10</i>    | mechanosensitive ion channel protein<br>10               |
| 29739.t000074 | 2.537  | 1.343  | 0.00015 | Up         | -                 | uncharacterized protein LOC8258603                       |
| 29739.t000120 | 2.071  | 1.051  | 0.00069 | Up         | <i>AtbHLH66</i>   | DNA-directed RNA polymerase beta<br>chain, putative      |
| 29739.t000172 | 6.389  | 2.675  | 0.00000 | Up         | -                 | protein LAZ1 homolog 2 isoform X1                        |
| 29747.t000030 | 0.387  | -1.369 | 0.00001 | Down       | -                 | conserved hypothetical protein                           |
| 29747.t000058 | 2.408  | 1.268  | 0.01031 | Up         | -                 | calmodulin binding protein, putative                     |
| 29751.t000050 | 0.416  | -1.264 | 0.00403 | Down       | <i>AtGSTU7</i>    | glutathione S-transferase U7                             |
| 29751.t000055 | 0.221  | -2.176 | 0.00000 | Down       | <i>AtGSTU7</i>    | glutathione S-transferase U7                             |
| 29751.t000085 | 2.344  | 1.229  | 0.00132 | Up         | <i>AtPP2C03</i>   | protein phosphatase 2c, putative                         |
| 29753.t000013 | 2.060  | 1.042  | 0.01827 | Up         | -                 | conserved hypothetical protein                           |
| 29757.t000029 | 4.872  | 2.284  | 0.00024 | Up         | -                 | conserved hypothetical protein                           |
| 29757.t000038 | 0.065  | -3.953 | 0.00000 | Down       | -                 | conserved hypothetical protein                           |
| 29761.t000013 | 4.586  | 2.197  | 0.00021 | Up         | -                 | hydrolase, hydrolyzing O-glycosyl<br>compounds, putative |
| 29780.t000063 | 10.454 | 3.386  | 0.00000 | Up         | -                 | non-specific lipid-transfer protein 4.1                  |
| 29780.t000072 | 0.305  | -1.711 | 0.00001 | Down       | -                 | aldo-keto reductase, putative                            |
| 29783.t000016 | 2.176  | 1.122  | 0.00007 | Up         | -                 | uncharacterized protein<br>DDB_G0282077                  |
| 29785.t000013 | 2.418  | 1.274  | 0.00688 | Up         | <i>NC2-alpha</i>  | dr1-associated corepressor                               |
| 29788.t000008 | 2.049  | 1.035  | 0.03763 | Up         | -                 | 12S seed storage globulin 1                              |
| 29788.t000021 | 0.289  | -1.789 | 0.00072 | Down       | <i>Gamma-TIP3</i> | aquaporin TIP1-3                                         |
| 29792.t000014 | 4.288  | 2.100  | 0.00001 | Up         | -                 | probable E3 ubiquitin-protein ligase<br>XERICO           |
| 29792.t000018 | 0.426  | -1.230 | 0.03445 | Down       | -                 | Alpha-L-fucosidase 2 precursor,<br>putative              |
| 29792.t000019 | 0.407  | -1.295 | 0.03394 | Down       | -                 | Alpha-L-fucosidase 2 precursor                           |

Table S1 (continued)

| Gene ID       | FC     | log2FC | pValue  | Regulation | Gene_symbol      | Description                                                   |
|---------------|--------|--------|---------|------------|------------------|---------------------------------------------------------------|
| 29794.t000038 | 0.454  | -1.138 | 0.02290 | Down       | -                | pollen-specific protein SF21                                  |
| 29794.t000071 | 3.776  | 1.917  | 0.00192 | Up         | <i>BnIII</i>     | Oleosin, putative                                             |
| 29794.t000085 | 2.758  | 1.464  | 0.00000 | Up         | -                | Protein pim1, putative                                        |
| 29794.t000108 | 4.003  | 2.001  | 0.00053 | Up         | -                | Histidine-containing phosphotransfer protein, putative        |
| 29801.t000139 | 0.314  | -1.671 | 0.00265 | Down       | -                | protein PLANT CADMIUM RESISTANCE 2                            |
| 29804.t000064 | 0.281  | -1.829 | 0.00001 | Down       | <i>AtOPT4</i>    | oligopeptide transporter 4                                    |
| 29806.t000002 | 0.475  | -1.073 | 0.00703 | Down       | <i>DcPSKR1</i>   | phytosulfokine receptor 1                                     |
| 29807.t000010 | 0.065  | -3.951 | 0.00004 | Down       | -                | conserved hypothetical protein                                |
| 29810.t000003 | 19.803 | 4.308  | 0.00000 | Up         | -                | E3 ubiquitin-protein ligase ATL31                             |
| 29813.t000070 | 2.482  | 1.311  | 0.03695 | Up         | -                | cytochrome P450 704B1                                         |
| 29815.t000004 | 15.568 | 3.961  | 0.00138 | Up         | -                | GDSL esterase/lipase At5g03820                                |
| 29815.t000032 | 78.393 | 6.293  | 0.04383 | Up         | -                | cytochrome P450 76A1                                          |
| 29820.t000023 | 0.067  | -3.906 | 0.00000 | Down       | -                | abscisic acid receptor PYL4                                   |
| 29822.t000169 | 9.480  | 3.245  | 0.00001 | Up         | -                | conserved hypothetical protein                                |
| 29825.t000015 | 0.240  | -2.060 | 0.00005 | Down       | -                | DUF21 domain-containing protein At2g14520 isoform X2          |
| 29827.t000092 | 0.362  | -1.467 | 0.04263 | Down       | -                | transferase, putative                                         |
| 29827.t000113 | 14.793 | 3.887  | 0.00000 | Up         | -                | conserved hypothetical protein                                |
| 29830.t000067 | 3.418  | 1.773  | 0.00000 | Up         | -                | conserved hypothetical protein                                |
| 29836.t000002 | 50.598 | 5.661  | 0.00000 | Up         | -                | conserved hypothetical protein                                |
| 29836.t000015 | 6.108  | 2.611  | 0.00002 | Up         | <i>ATP-PFK 2</i> | phosphofructokinase, putative                                 |
| 29838.t000086 | 0.063  | -3.994 | 0.03079 | Down       | -                | conserved hypothetical protein                                |
| 29841.t000023 | 0.005  | -7.642 | 0.02768 | Down       | -                | gibberellin 3-beta hydroxylase, putative                      |
| 29841.t000070 | Inf    | Inf    | 0.00060 | Up         | -                | late embryogenesis abundant protein D-7                       |
| 29841.t000092 | 26.129 | 4.708  | 0.01215 | Up         | -                | metallothiol transferase FosB                                 |
| 29841.t000117 | 10.106 | 3.337  | 0.00000 | Up         | -                | aspartate, glycine, lysine and serine-rich protein            |
| 29841.t000174 | 0.295  | -1.763 | 0.01900 | Down       | -                | arsenite transport protein, putative                          |
| 29842.t000053 | 2.638  | 1.399  | 0.00000 | Up         | -                | aspartic proteinase                                           |
| 29842.t000126 | 0.396  | -1.335 | 0.03470 | Down       | <i>AtBGLU47</i>  | beta-glucosidase 46 isoform X1                                |
| 29844.t000021 | 0.064  | -3.969 | 0.00004 | Down       | -                | auxin-responsive protein IAA4                                 |
| 29844.t000033 | 2.779  | 1.475  | 0.02277 | Up         | <i>KCS-20</i>    | acyltransferase, putative                                     |
| 29844.t000045 | 5.027  | 2.330  | 0.00002 | Up         | -                | vegetative cell wall protein gp1                              |
| 29844.t000054 | 7.680  | 2.941  | 0.00000 | Up         | -                | putative calcium-transporting ATPase 13, plasma membrane-type |
| 29844.t000066 | 4.947  | 2.307  | 0.01358 | Up         | <i>ELIP</i>      | early light-induced protein, chloroplastic                    |
| 29851.t000069 | 3.972  | 1.990  | 0.00000 | Up         | -                | uncharacterized protein LOC8279516 isoform X1                 |

Table S1 (continued)

| Gene ID       | FC     | log2FC | pValue  | Regulation | Gene_symbol      | Description                                                   |
|---------------|--------|--------|---------|------------|------------------|---------------------------------------------------------------|
| 29851.t000118 | 7.477  | 2.902  | 0.00000 | Up         | -                | uncharacterized WD repeat-containing protein all2124          |
| 29851.t000125 | 2.689  | 1.427  | 0.00001 | Up         | -                | conserved hypothetical protein                                |
| 29851.t000145 | 0.482  | -1.052 | 0.00066 | Down       | <i>AtCBP1</i>    | conserved hypothetical protein                                |
| 29863.t000015 | 0.306  | -1.708 | 0.02585 | Down       | <i>AtCesA2</i>   | cellulose synthase A catalytic subunit 5 [UDP-forming]        |
| 29864.t000073 | 0.193  | -2.371 | 0.00000 | Down       | -                | cytokinin riboside 5'-monophosphate phosphoribohydrolase LOG1 |
| 29869.t000041 | 8.179  | 3.032  | 0.00000 | Up         | <i>AtHsp22.0</i> | 22.7 kDa class IV heat shock protein                          |
| 29877.t000013 | 7.894  | 2.981  | 0.00000 | Up         | <i>AtHIP23</i>   | heavy metal-associated isoprenylated plant protein 26         |
| 29878.t000010 | 0.422  | -1.245 | 0.04730 | Down       | -                | conserved hypothetical protein                                |
| 29883.t000047 | 0.307  | -1.705 | 0.00000 | Down       | -                | auxin-induced protein 22E                                     |
| 29889.t000030 | 0.120  | -3.056 | 0.00000 | Down       | -                | uncharacterized protein LOC8258783                            |
| 29889.t000044 | 3.510  | 1.811  | 0.00036 | Up         | <i>AtbZIP1</i>   | Ocs element-binding factor, putative                          |
| 29889.t000095 | 10.129 | 3.340  | 0.02483 | Up         | -                | enzyme inhibitor, putative                                    |
| 29889.t000096 | 5.694  | 2.510  | 0.00085 | Up         | <i>AtC/VIF1</i>  | cell wall / vacuolar inhibitor of fructosidase 1              |
| 29889.t000116 | 2.428  | 1.280  | 0.00064 | Up         | -                | transcription factor MYB108                                   |
| 29895.t000004 | 3.542  | 1.825  | 0.00000 | Up         | <i>ADF</i>       | actin-depolymerizing factor                                   |
| 29895.t000011 | 5.121  | 2.356  | 0.00309 | Up         | -                | conserved hypothetical protein                                |
| 29898.t000003 | 0.241  | -2.055 | 0.00000 | Down       | -                | probable pectate lyase 13                                     |
| 29900.t000034 | 0.454  | -1.139 | 0.00800 | Down       | <i>OsNCL2</i>    | calmodulin, putative                                          |
| 29900.t000061 | 0.105  | -3.249 | 0.00219 | Down       | -                | protein CHUP1, chloroplastic                                  |
| 29900.t000076 | 4.933  | 2.302  | 0.03385 | Up         | -                | uncharacterized protein LOC8259230                            |
| 29900.t000079 | 0.380  | -1.396 | 0.00003 | Down       | <i>AtHIP28</i>   | copper ion binding protein, putative                          |
| 29901.t000011 | 0.191  | -2.387 | 0.00144 | Down       | -                | cytochrome P450, putative                                     |
| 29904.t000112 | 4.609  | 2.205  | 0.01069 | Up         | -                | uncharacterized PE-PGRS family protein PE_PGRS46              |
| 29907.t000020 | 0.392  | -1.352 | 0.00726 | Down       | -                | conserved hypothetical protein                                |
| 29907.t000033 | 0.202  | -2.310 | 0.00313 | Down       | <i>AtOPR1</i>    | 12-oxophytodienoate reductase opr, putative                   |
| 29908.t000032 | 14.080 | 3.816  | 0.00001 | Up         | <i>AtHIP24</i>   | metal ion binding protein, putative                           |
| 29908.t000100 | 0.310  | -1.692 | 0.00373 | Down       | <i>GjUGT2</i>    | 7-deoxyloganetin glucosyltransferase                          |
| 29908.t000108 | 4.244  | 2.086  | 0.00001 | Up         | -                | protein EXORDIUM                                              |
| 29908.t000110 | 4.250  | 2.087  | 0.00000 | Up         | -                | protein EXORDIUM-like 2                                       |
| 29912.t000073 | 0.217  | -2.201 | 0.03547 | Down       | <i>AtMIOX4</i>   | PREDICTED: inositol oxygenase 4                               |
| 29912.t000151 | 0.145  | -2.782 | 0.00924 | Down       | -                | dipeptidase, putative                                         |
| 29912.t000165 | 0.212  | -2.240 | 0.00398 | Down       | <i>AtDTX51</i>   | protein DETOXIFICATION 52                                     |
| 29912.t000219 | 2.366  | 1.242  | 0.00001 | Up         | -                | sugar transporter, putative                                   |
| 29915.t000001 | 3.432  | 1.779  | 0.00000 | Up         | <i>LTP</i>       | non-specific lipid-transfer protein 1                         |
| 29916.t000019 | 2.883  | 1.528  | 0.00000 | Up         | <i>AtHsp23.6</i> | small heat shock protein, chloroplastic                       |

Table S1 (continued)

| Gene ID            | FC     | log2FC | pValue  | Regulation | Gene_symbol                                | Description                                           |
|--------------------|--------|--------|---------|------------|--------------------------------------------|-------------------------------------------------------|
| 29924.t000001      | 0.412  | -1.281 | 0.00071 | Down       | <i>AtBGLU44</i>                            | beta-glucosidase 44                                   |
| 29929.t000114      | 0.237  | -2.074 | 0.00000 | Down       | -                                          | ACT domain-containing protein ACR4                    |
| 29929.t000135      | 37.381 | 5.224  | 0.00000 | Up         | -                                          | uncharacterized protein LOC8286778                    |
| 29933.t000025      | 0.421  | -1.249 | 0.00071 | Down       | <i>atDjC76</i>                             | heat shock protein binding protein,<br>putative       |
| 29933.t000061      | 2.550  | 1.351  | 0.00009 | Up         | <i>AtMYB102</i>                            | r2r3-myb transcription factor, putative               |
| 29933.t000062      | 28.415 | 4.829  | 0.00000 | Up         | -                                          | phosphatidylethanolamine-binding<br>protein, putative |
| 29933.t000068      | 0.206  | -2.276 | 0.00000 | Down       | <i>AtENT3</i>                              | equilibrative nucleotide transporter 3                |
| 29933.t000069      | 0.343  | -1.542 | 0.00000 | Down       | -                                          | uncharacterized protein LOC8275382                    |
| 29948.t000018      | 0.356  | -1.491 | 0.01327 | Down       | -                                          | endoglucanase 11                                      |
| 29983.t000020      | 2.235  | 1.160  | 0.01417 | Up         | -                                          | nucleic acid binding protein, putative                |
| <i>Arabidopsis</i> |        |        |         |            |                                            |                                                       |
| 29983.t000080      | 0.410  | -1.286 | 0.00726 | Down       | <i>thaliana</i>                            | probable L-type lectin-domain                         |
|                    |        |        |         |            | <i>lectin-recepto</i>                      | containing receptor kinase VII.2                      |
|                    |        |        |         |            | <i>r kinase d</i>                          |                                                       |
| 29983.t000126      | 2.265  | 1.179  | 0.00011 | Up         | <i>AtERF53</i>                             | ethylene-responsive transcription factor<br>ERF054    |
| 29983.t000156      | 0.189  | -2.404 | 0.00001 | Down       | -                                          | formimidoyltransferase-cyclodeaminase<br>isoform X3   |
| 29993.t000017      | 0.413  | -1.277 | 0.00510 | Down       | -                                          | probable galacturonosyltransferase 15                 |
| 29993.t000024      | 5.415  | 2.437  | 0.00000 | Up         | <i>At-XTH15</i>                            | xyloglucan                                            |
|                    |        |        |         |            |                                            | endotransglucosylase/hydrolase 2                      |
| 30003.t000020      | 56.989 | 5.833  | 0.00001 | Up         | <i>(1-&gt;3)-beta-g</i>                    | Glucan endo-1,3-beta-glucosidase                      |
|                    |        |        |         |            | <i>lucanase</i>                            | precursor, putative                                   |
| 30003.t000021      | 3.394  | 1.763  | 0.00086 | Up         | <i>(1-&gt;3)-beta-g</i><br><i>lucanase</i> | glucan endo-1,3-beta-glucosidase                      |
| 30027.t000020      | 2.291  | 1.196  | 0.00366 | Up         | -                                          | uncharacterized protein LOC8282436                    |
| 30027.t000022      | 7.619  | 2.930  | 0.01649 | Up         | -                                          | uncharacterized protein LOC8282438                    |
| 30032.t000010      | 0.301  | -1.731 | 0.01711 | Down       | <i>PRCP</i>                                | lysosomal Pro-X carboxypeptidase<br>isoform X1        |
| 30060.t000022      | 0.185  | -2.434 | 0.00107 | Down       | -                                          | protein EXORDIUM-like 7                               |
| 30064.t000028      | 3.401  | 1.766  | 0.00001 | Up         | <i>AtWRKY6</i>                             | probable WRKY transcription factor<br>31              |
| 30068.t000007      | 0.188  | -2.414 | 0.00004 | Down       | <i>AtCslG3</i>                             | transferase, putative                                 |
| 30068.t000048      | 0.298  | -1.747 | 0.00000 | Down       | <i>AtOPT7</i>                              | oligopeptide transporter 7                            |
| 30068.t000068      | 0.024  | -5.352 | 0.00000 | Down       | -                                          | cytochrome P450 78A9                                  |
| 30073.t000078      | 12.282 | 3.618  | 0.04996 | Up         | -                                          | PREDICTED: bark storage protein A                     |
| 30074.t000080      | 3.074  | 1.620  | 0.00023 | Up         | -                                          | conserved hypothetical protein                        |
| 30076.t000001      | 0.353  | -1.504 | 0.00650 | Down       | -                                          | uncharacterized protein LOC8265172                    |
| 30076.t000026      | 49.423 | 5.627  | 0.00001 | Up         | <i>S3H DLO1</i>                            | 1-aminocyclopropane-1-carboxylate<br>oxidase 5        |

Table S1 (continued)

| Gene ID       | FC      | log2FC     | pValue  | Regulation | Gene_symbol       | Description                                                 |
|---------------|---------|------------|---------|------------|-------------------|-------------------------------------------------------------|
| 30076.t000077 | 64.896  | 6.020      | 0.04481 | Up         | -                 | mannan endo-1,4-beta-mannosidase 4                          |
| 30076.t000087 | 0.344   | -1.537     | 0.00089 | Down       | -                 | hypothetical protein RCOM_1342140                           |
| 30076.t000171 | 2.044   | 1.031      | 0.00042 | Up         | <i>AtMYB78</i>    | transcription factor MYB108                                 |
| 30076.t000182 | 3.578   | 1.839      | 0.00000 | Up         | <i>AtGPAT3</i>    | Glycerol-3-phosphate acyltransferase, putative              |
| 30076.t000239 | 0.482   | -1.054     | 0.03086 | Down       | <i>AtBXL2</i>     | probable beta-D-xylosidase 2                                |
| 30076.t000266 | 5.029   | 2.330      | 0.00000 | Up         | -                 | uncharacterized protein LOC8265165                          |
| 30078.t000023 | 0.275   | -1.863     | 0.00947 | Down       | -                 | retinoid-inducible serine carboxypeptidase, putative        |
| 30091.t000001 | 0.222   | -2.172     | 0.04931 | Down       | <i>Ps6OMT</i>     | 3'-hydroxy-N-methyl-(S)-coclaurine 4'-O-methyltransferase 2 |
| 30099.t000062 | 0.298   | -1.746     | 0.00275 | Down       | -                 | uncharacterized protein LOC8268907                          |
| 30099.t000076 | 3.075   | 1.621      | 0.00001 | Up         | <i>AtEGY3</i>     | probable zinc metallopeptidase EGY3, chloroplastic          |
| 30099.t000103 | 0.450   | -1.151     | 0.00092 | Down       | -                 | serine carboxypeptidase, putative                           |
| 30114.t000003 | 0.356   | -1.489     | 0.00499 | Down       | -                 | putative glutamine amidotransferase YLR126C                 |
| 30115.t000049 | 0.000   | #NAM<br>E? | 0.03013 | Down       | -                 | uncharacterized protein LOC8270745                          |
| 30116.t000010 | 4.257   | 2.090      | 0.00000 | Up         | -                 | Basic blue protein, putative                                |
| 30116.t000011 | 5.736   | 2.520      | 0.00005 | Up         | -                 | conserved hypothetical protein                              |
| 30128.t000001 | 0.316   | -1.662     | 0.01695 | Down       | <i>AtDUF7</i>     | uncharacterized protein LOC8285676 isoform X2               |
| 30128.t000039 | 3.655   | 1.870      | 0.00030 | Up         | <i>AtHAK1</i>     | Potassium transporter, putative                             |
| 30128.t000040 | 4.162   | 2.057      | 0.00003 | Up         | <i>AtHAK1</i>     | Potassium transporter, putative                             |
| 30128.t000181 | 0.471   | -1.087     | 0.01821 | Down       | -                 | uncharacterized protein LOC8285509                          |
| 30128.t000370 | 2.264   | 1.179      | 0.00002 | Up         | -                 | nicotianamine synthase                                      |
| 30128.t000417 | 8.139   | 3.025      | 0.00000 | Up         | -                 | histone chaperone ASF1                                      |
| 30128.t000505 | 8.849   | 3.146      | 0.00000 | Up         | -                 | GEM-like protein 5                                          |
| 30129.t000022 | 13.699  | 3.776      | 0.00011 | Up         | <i>AtTSPO</i>     | translocator protein homolog                                |
| 30130.t000009 | 0.215   | -2.220     | 0.00065 | Down       | -                 | phototropin-1                                               |
| 30131.t000021 | 0.165   | -2.601     | 0.00001 | Down       | -                 | conserved hypothetical protein                              |
| 30131.t000022 | 0.187   | -2.416     | 0.00009 | Down       | -                 | serine-threonine protein kinase, plant-type, putative       |
| 30131.t000160 | 2.136   | 1.095      | 0.00253 | Up         | <i>RcCASPLIF2</i> | RecName: Full=CASP-like protein 1F2,Short=RcCASPL1F2        |
| 30131.t000411 | 0.324   | -1.626     | 0.00497 | Down       | -                 | GEM-like protein 4                                          |
| 30136.t000020 | 7.718   | 2.948      | 0.00003 | Up         | -                 | uncharacterized protein LOC8259126                          |
| 30136.t000048 | 107.578 | 6.749      | 0.00065 | Up         | -                 | uncharacterized protein LOC8259154                          |
| 30138.t000158 | 31.541  | 4.979      | 0.00000 | Up         | -                 | chaperone protein ClpB1                                     |
| 30138.t000195 | 0.414   | -1.273     | 0.00001 | Down       | <i>AtbHLH72</i>   | DNA binding protein, putative                               |
| 30138.t000233 | 5.504   | 2.460      | 0.00073 | Up         | <i>AtEXPA15</i>   | expansin-A15                                                |

Table S1 (continued)

| Gene ID       | FC     | log2FC | pValue  | Regulation | Gene_symbol               | Description                                                             |
|---------------|--------|--------|---------|------------|---------------------------|-------------------------------------------------------------------------|
| 30143.t000033 | 2.877  | 1.525  | 0.00000 | Up         | <i>P5CS</i>               | delta-1-pyrroline-5-carboxylate synthase                                |
| 30143.t000059 | 4.841  | 2.275  | 0.00452 | Up         | -                         | uncharacterized protein LOC8287504                                      |
| 30146.t000007 | 7.238  | 2.856  | 0.00006 | Up         | -                         | conserved hypothetical protein                                          |
| 30146.t000011 | 2.894  | 1.533  | 0.00000 | Up         | -                         | hypothetical protein RCOM_1485780                                       |
| 30146.t000085 | 2.264  | 1.179  | 0.00052 | Up         | -                         | histidine-containing phosphotransfer protein 4                          |
| 30147.t000015 | 78.866 | 6.301  | 0.02086 | Up         | -                         | hypothetical protein RCOM_1496000                                       |
| 30147.t000045 | 6.764  | 2.758  | 0.00000 | Up         | -                         | uncharacterized protein LOC8266341                                      |
| 30147.t000145 | 4.551  | 2.186  | 0.00000 | Up         | -                         | C2 and GRAM domain-containing protein At5g50170 isoform X1              |
| 30147.t000391 | 0.341  | -1.554 | 0.02536 | Down       | -                         | Phytochrome kinase substrate, putative                                  |
| 30147.t000507 | 5.679  | 2.506  | 0.00000 | Up         | -                         | conserved hypothetical protein                                          |
| 30147.t000584 | 7.645  | 2.934  | 0.00000 | Up         | <i>Protein DREB1A</i>     | dehydration-responsive element-binding protein 1A                       |
| 30147.t000595 | 2.866  | 1.519  | 0.03395 | Up         | -                         | conserved hypothetical protein                                          |
| 30147.t000657 | 7.673  | 2.940  | 0.02132 | Up         | -                         | uncharacterized protein LOC8277423                                      |
| 30147.t000725 | 5.773  | 2.529  | 0.00002 | Up         | -                         | calmodulin binding protein, putative                                    |
| 30147.t000754 | 12.387 | 3.631  | 0.00000 | Up         | -                         | MADS-box transcription factor, putative                                 |
| 30147.t000803 | 0.352  | -1.505 | 0.00368 | Down       | -                         | leucine-rich repeat protein, putative                                   |
| 30156.t000039 | 4.572  | 2.193  | 0.00000 | Up         | <i>AtBBX30</i>            | DNA binding protein, putative                                           |
| 30169.t000292 | 17.880 | 4.160  | 0.00000 | Up         | <i>OsPP2C08</i>           | probable protein phosphatase 2C 51                                      |
| 30169.t000342 | 5.003  | 2.323  | 0.00000 | Up         | -                         | G-type lectin S-receptor-like serine/threonine-protein kinase At5g24080 |
| 30169.t000349 | 9.391  | 3.231  | 0.03464 | Up         | -                         | late embryogenesis abundant protein At1g64065                           |
| 30170.t000054 | 3.219  | 1.687  | 0.00196 | Up         | <i>EPF-like protein 2</i> | EPIDERMAL PATTERNING FACTOR-like protein 2                              |
| 30170.t000064 | 3.202  | 1.679  | 0.00252 | Up         | <i>HlBCAT1</i>            | branched-chain amino acid aminotransferase, putative                    |
| 30170.t000232 | 3.524  | 1.817  | 0.00000 | Up         | -                         | uncharacterized protein LOC8288554                                      |
| 30170.t000289 | 3.326  | 1.734  | 0.00013 | Up         | -                         | alpha-amylase                                                           |
| 30170.t000298 | 0.215  | -2.220 | 0.00000 | Down       | -                         | conserved hypothetical protein                                          |
| 30170.t000370 | Inf    | Inf    | 0.03232 | Up         | -                         | cytochrome P450 CYP82D47                                                |
| 30170.t000474 | 0.222  | -2.172 | 0.00013 | Down       | -                         | uncharacterized protein LOC8288949                                      |
| 30170.t000484 | 2.508  | 1.326  | 0.02754 | Up         | <i>DFR</i>                | dihydroflavonol-4-reductase                                             |
| 30170.t000491 | 0.091  | -3.452 | 0.00561 | Down       | -                         | jasmonate O-methyltransferase                                           |
| 30170.t000565 | 10.639 | 3.411  | 0.01098 | Up         | -                         | cytochrome P450 83B1                                                    |
| 30170.t000594 | 3.217  | 1.686  | 0.00000 | Up         | -                         | conserved hypothetical protein                                          |
| 30170.t000619 | 0.409  | -1.290 | 0.00000 | Down       | -                         | cytochrome P450 81E8                                                    |

Table S1 (continued)

| Gene ID       | FC     | log2FC | pValue  | Regulation | Gene_symbol                       | Description                                                            |
|---------------|--------|--------|---------|------------|-----------------------------------|------------------------------------------------------------------------|
| 30170.t000624 | 0.212  | -2.238 | 0.00449 | Down       | -                                 | putative receptor protein kinase<br>ZmPK1                              |
| 30170.t000692 | 3.010  | 1.590  | 0.00045 | Up         | -                                 | E3 ubiquitin-protein ligase ATL23                                      |
| 30170.t000693 | 4.203  | 2.072  | 0.00000 | Up         | <i>OsNrx2</i>                     | probable nucleoredoxin 2 isoform X4                                    |
| 30170.t000710 | 12.610 | 3.656  | 0.00833 | Up         | <i>ODC</i>                        | ornithine decarboxylase                                                |
| 30170.t000711 | 3.179  | 1.669  | 0.02341 | Up         | <i>ODC</i>                        | ornithine decarboxylase isoform X1                                     |
| 30170.t000771 | 2.389  | 1.257  | 0.00001 | Up         | -                                 | starch branching enzyme II, putative                                   |
| 30170.t000790 | 0.230  | -2.122 | 0.00016 | Down       | -                                 | calcium lipid binding protein, putative<br><i>Sphingoid</i>            |
| 30174.t000076 | 0.162  | -2.629 | 0.00000 | Down       | <i>LCB</i><br><i>desaturase 2</i> | delta(8)-fatty-acid desaturase 2                                       |
| 30174.t000082 | 8.883  | 3.151  | 0.00000 | Up         | -                                 | BAG family molecular chaperone<br>regulator 6                          |
| 30174.t000125 | 4.161  | 2.057  | 0.00000 | Up         | <i>BnIII</i>                      | oleosin 1                                                              |
| 30174.t000270 | 3.381  | 1.758  | 0.00012 | Up         | -                                 | leucine rich repeat receptor kinase,<br>putative                       |
| 30174.t000472 | 3.936  | 1.977  | 0.04577 | Up         | -                                 | conserved hypothetical protein                                         |
| 30174.t000495 | 3.254  | 1.702  | 0.00000 | Up         | <i>ABIS-binding<br/>protein 2</i> | ninja-family protein AFP2 isoform X1                                   |
| 30174.t000550 | 17.454 | 4.126  | 0.00021 | Up         | <i>POMGnT2</i>                    | glycosyltransferase, putative                                          |
| 30179.t000016 | 0.283  | -1.820 | 0.00003 | Down       | -                                 | serine-threonine protein kinase,<br>plant-type, putative<br>xyloglucan |
| 30179.t000018 | Inf    | Inf    | 0.02919 | Up         | <i>At-XTH22</i>                   | endotransglucosylase/hydrolase protein<br>22                           |
| 30179.t000025 | 20.590 | 4.364  | 0.00007 | Up         | <i>At-XTH25</i>                   | xyloglucan:xyloglucosyl transferase,<br>putative                       |
| 30183.t000014 | 14.374 | 3.845  | 0.00000 | Up         | <i>OC-X</i>                       | cysteine proteinase inhibitor 5                                        |
| 30190.t000051 | 0.344  | -1.539 | 0.00830 | Down       | -                                 | hypothetical protein RCOM_1691440                                      |
| 30190.t000145 | 0.343  | -1.544 | 0.00069 | Down       | -                                 | anthocyanidin 3-O-glucosyltransferase                                  |
| 30190.t000196 | 0.490  | -1.029 | 0.01162 | Down       | -                                 | uncharacterized protein LOC8271767                                     |
| 30190.t000213 | 18.712 | 4.226  | 0.00000 | Up         | -                                 | uncharacterized protein LOC8271784                                     |
| 30190.t000497 | 3.496  | 1.806  | 0.00000 | Up         | -                                 | conserved hypothetical protein                                         |
| 30190.t000498 | 4.593  | 2.199  | 0.00000 | Up         | <i>GenCHYB</i>                    | beta-carotene 3-hydroxylase,<br>chloroplastic isoform X1               |
| 30190.t000545 | 4.516  | 2.175  | 0.00000 | Up         | <i>DROJ1</i>                      | dnaJ homolog subfamily B member 13                                     |
| 30190.t000559 | 0.368  | -1.444 | 0.00614 | Down       | <i>AtERF12</i>                    | ethylene-responsive transcription factor<br>12                         |
| 30204.t000008 | 4.299  | 2.104  | 0.00002 | Up         | -                                 | uncharacterized protein LOC8264934<br>isoform X1                       |
| 30226.t000067 | 3.423  | 1.775  | 0.00117 | Up         | <i>AtXYLP9</i>                    | lipid binding protein, putative                                        |
| 33363.t000001 | 2.180  | 1.125  | 0.00928 | Up         | -                                 | aldehyde dehydrogenase family 7                                        |

**Table S1 (continued)**

| Gene ID       | FC    | log2FC | pValue  | Regulation | Gene_symbol     | Description                                                     |
|---------------|-------|--------|---------|------------|-----------------|-----------------------------------------------------------------|
| 38153.t000001 | 3.814 | 1.931  | 0.00001 | Up         | -               | conserved hypothetical protein, partial                         |
| 49862.t000001 | 0.178 | -2.487 | 0.02084 | Down       | <i>S3H DLO1</i> | Flavonol synthase/flavanone<br>3-hydroxylase, putative, partial |

**Table S2.** 283 DEGs (176 up-regulated and 107 down-regulated) involved in roots of castor under salt stress.

| Gene ID       | FC     | log2FC | pValue  | Regulation | Gene_symbol                                        | Description                                                                |
|---------------|--------|--------|---------|------------|----------------------------------------------------|----------------------------------------------------------------------------|
| 27504.t000004 | 2.332  | 1.221  | 0.00332 | Up         | <i>Cysteine-rich</i><br><i>RLK3</i>                | cysteine-rich receptor-like protein kinase<br>3                            |
| 27504.t000029 | 2.001  | 1.001  | 0.01008 | Up         | -                                                  | uncharacterized protein LOC8273499                                         |
| 27538.t000015 | 2.812  | 1.492  | 0.00058 | Up         | -                                                  | ubiquitin-like protein 5                                                   |
| 27561.t000009 | 0.115  | -3.126 | 0.01318 | Down       | -                                                  | UDP-glucuronosyltransferase, putative                                      |
| 27766.t000007 | 3.245  | 1.698  | 0.00000 | Up         | -                                                  | pathogenesis-related protein PR-1                                          |
| 27789.t000001 | 2.197  | 1.136  | 0.00000 | Up         | -                                                  | aldehyde dehydrogenase family 7<br>member B4                               |
| 27894.t000028 | 0.395  | -1.339 | 0.00020 | Down       | <i>OsbZIP03</i>                                    | conserved hypothetical protein                                             |
| 27940.t000006 | 2.386  | 1.255  | 0.00000 | Up         | <i>At-EXPR1</i>                                    | expansin-like B1                                                           |
| 27985.t000008 | 0.449  | -1.156 | 0.00350 | Down       | -                                                  | serine-threonine protein kinase,<br>plant-type, putative                   |
| 27985.t000009 | 3.120  | 1.642  | 0.01621 | Up         | -                                                  | serine-threonine protein kinase,<br>plant-type, putative                   |
| 28152.t000048 | 6.927  | 2.792  | 0.00000 | Up         | -                                                  | conserved hypothetical protein                                             |
| 28180.t000017 | 0.294  | -1.764 | 0.00760 | Down       | <i>Gamma-TIP3</i>                                  | aquaporin TIP1-3                                                           |
| 28196.t000005 | 0.122  | -3.033 | 0.02904 | Down       | -                                                  | flavonoid 3-hydroxylase, putative                                          |
| 28207.t000006 | 2.451  | 1.293  | 0.00091 | Up         | <i>AS2-like</i><br><i>protein 38</i>               | LOB domain-containing protein, putative                                    |
| 28219.t000002 | 3.983  | 1.994  | 0.00000 | Up         | <i>ANAC072</i>                                     | NAC domain-containing protein 72                                           |
| 28327.t000015 | 0.132  | -2.919 | 0.00770 | Down       | -                                                  | Tyrosine-specific transport protein,<br>putative                           |
| 28345.t000005 | 2.505  | 1.325  | 0.00816 | Up         | <i>RA 1</i>                                        | ribulose biphosphate<br>carboxylase/oxygenase activase 2,<br>chloroplastic |
| 28345.t000008 | 3.390  | 1.761  | 0.00143 | Up         | -                                                  | subtilisin inhibitor 1, putative                                           |
| 28401.t000005 | 0.259  | -1.948 | 0.02279 | Down       | <i>PPIase</i><br><i>FKBP65</i>                     | peptidylprolyl isomerase, putative                                         |
| 28623.t000008 | 0.498  | -1.006 | 0.00000 | Down       | -                                                  | uncharacterized protein LOC8286660                                         |
| 28650.t000008 | 0.159  | -2.653 | 0.00000 | Down       | -                                                  | conserved hypothetical protein                                             |
| 28663.t000002 | 2.047  | 1.034  | 0.00000 | Up         | <i>AtNSP2</i>                                      | nitrile-specifier protein 5                                                |
| 28752.t000001 | 0.383  | -1.383 | 0.00045 | Down       | -                                                  | serine-threonine protein kinase,<br>plant-type, putative                   |
| 28850.t000001 | 4.008  | 2.003  | 0.00000 | Up         | <i>CER2-like1</i>                                  | protein ECERIFERUM 26                                                      |
| 28872.t000005 | 23.303 | 4.542  | 0.00000 | Up         | -                                                  | putative glycine-rich cell wall structural<br>protein 1                    |
| 28927.t000001 | 2.545  | 1.348  | 0.00000 | Up         | <i>ABC</i><br><i>transporter</i><br><i>ABCG.25</i> | ATP-binding cassette transporter,<br>putative                              |
| 29044.t000010 | 2.428  | 1.280  | 0.02319 | Up         | <i>LTP</i>                                         | non-specific lipid-transfer protein 1                                      |
| 29485.t000003 | 3.688  | 1.883  | 0.03180 | Up         | -                                                  | small heat shock protein, chloroplastic<br>isoform X1                      |

Table S2 (continued)

| Gene ID       | FC     | log2FC | pValue  | Regulation | Gene_symbol     | Description                                              |
|---------------|--------|--------|---------|------------|-----------------|----------------------------------------------------------|
| 29489.t000010 | 0.491  | -1.026 | 0.00132 | Down       | -               | serine-threonine protein kinase, plant-type,<br>putative |
| 29589.t000028 | 0.494  | -1.019 | 0.00002 | Down       | -               | protein NUCLEAR FUSION<br>DEFECTIVE 4                    |
| 29589.t000071 | 3.273  | 1.711  | 0.01582 | Up         | <i>PRCP</i>     | lysosomal Pro-X carboxypeptidase                         |
| 29596.t000001 | 5.824  | 2.542  | 0.00000 | Up         | -               | uncharacterized protein At5g65660                        |
| 29601.t000020 | 4.012  | 2.004  | 0.00000 | Up         | -               | protein SLE1                                             |
| 29610.t000003 | 5.156  | 2.366  | 0.01197 | Up         | -               | 17.3 kDa class I heat shock protein                      |
| 29615.t000004 | 0.293  | -1.773 | 0.03231 | Down       | -               | conserved hypothetical protein                           |
| 29628.t000019 | 2.359  | 1.238  | 0.02768 | Up         | -               | pentatricopeptide repeat-containing<br>protein, putative |
| 29633.t000030 | 24.705 | 4.627  | 0.00652 | Up         | -               | class I heat shock protein                               |
| 29647.t000065 | Inf    | Inf    | 0.04849 | Up         | <i>LEA D-34</i> | late embryogenesis abundant protein D-34                 |
| 29648.t000015 | 2.974  | 1.572  | 0.00000 | Up         | <i>AtFBL5</i>   | F-box protein SKP2A                                      |
| 29656.t000020 | 3.588  | 1.843  | 0.00721 | Up         | -               | protein NUCLEAR FUSION<br>DEFECTIVE 4                    |
| 29656.t000021 | 0.326  | -1.617 | 0.00068 | Down       | <i>AtOPT7</i>   | Oligopeptide transporter, putative                       |
| 29661.t000036 | 2.034  | 1.024  | 0.00001 | Up         | -               | conserved hypothetical protein                           |
| 29665.t000004 | 4.782  | 2.258  | 0.00000 | Up         | -               | secoisolariciresinol dehydrogenase                       |
| 29666.t000042 | 2.156  | 1.108  | 0.00474 | Up         | -               | polygalacturonase, putative                              |
| 29667.t000013 | 2.583  | 1.369  | 0.00000 | Up         | <i>AtOCT7</i>   | sugar transporter, putative                              |
| 29678.t000017 | 2.496  | 1.320  | 0.00636 | Up         | -               | UDP-glycosyltransferase 74E2                             |
| 29681.t000040 | 0.484  | -1.048 | 0.01924 | Down       | -               | ammonium transporter 1 member 3                          |
| 29682.t000035 | 0.287  | -1.801 | 0.00000 | Down       | -               | uncharacterized protein LOC8288347                       |
| 29684.t000002 | 0.404  | -1.308 | 0.00158 | Down       | <i>PE 35</i>    | pectinesterase                                           |
| 29692.t000006 | 2.125  | 1.087  | 0.00000 | Up         | <i>AtPCR2</i>   | protein PLANT CADMIUM<br>RESISTANCE 2                    |
| 29693.t000012 | 2.518  | 1.332  | 0.00000 | Up         | -               | ornithine aminotransferase, mitochondrial<br>isoform X2  |
| 29693.t000021 | Inf    | Inf    | 0.00001 | Up         | -               | uncharacterized protein LOC8264084                       |
| 29693.t000022 | 13.366 | 3.741  | 0.01486 | Up         | -               | serine-threonine protein kinase, plant-type,<br>putative |
| 29701.t000015 | 3.641  | 1.864  | 0.00000 | Up         | -               | GDSL esterase/lipase CPRD49                              |
| 29703.t000027 | 2.353  | 1.235  | 0.02389 | Up         | -               | vicilin-like antimicrobial peptides 2-2                  |
| 29703.t000080 | 4.571  | 2.193  | 0.00000 | Up         | -               | uncharacterized protein LOC8285864                       |
| 29724.t000016 | 0.424  | -1.238 | 0.00000 | Down       | -               | 36.4 kDa proline-rich protein                            |
| 29724.t000024 | 2.172  | 1.119  | 0.03313 | Up         | <i>FaGT6</i>    | anthocyanidin 3-O-glucosyltransferase 6                  |
| 29726.t000070 | 0.332  | -1.589 | 0.00046 | Down       | -               | sugar transporter, putative                              |
| 29726.t000131 | 0.370  | -1.436 | 0.01937 | Down       | <i>AtSRG1</i>   | protein SRG1                                             |
| 29726.t000175 | 0.045  | -4.487 | 0.00212 | Down       | -               | phylloplanin                                             |
| 29726.t000176 | 4.783  | 2.258  | 0.00000 | Up         | -               | late embryogenesis abundant protein Lea5<br>isoform X2   |

Table S2 (continued)

| Gene ID       | FC     | log2FC | pValue  | Regulation | Gene_symbol       | Description                                               |
|---------------|--------|--------|---------|------------|-------------------|-----------------------------------------------------------|
| 29726.t000183 | 2.897  | 1.535  | 0.00000 | Up         | -                 | uncharacterized protein LOC8278753                        |
| 29727.t000025 | 0.066  | -3.920 | 0.00000 | Down       | <i>AtGLO4</i>     | peroxisomal (S)-2-hydroxy-acid oxidase<br>GLO4            |
| 29729.t000023 | 0.194  | -2.364 | 0.00000 | Down       | -                 | abscisic acid receptor PYL4                               |
| 29729.t000037 | 2.059  | 1.042  | 0.00141 | Up         | -                 | prephenate dehydrogenase, putative                        |
| 29738.t000053 | 2.142  | 1.099  | 0.00000 | Up         | -                 | plastid-lipid-associated protein,<br>chloroplastic        |
| 29739.t000038 | 0.440  | -1.186 | 0.00000 | Down       | <i>AtMSL10</i>    | mechanosensitive ion channel protein 10                   |
| 29739.t000074 | 2.238  | 1.162  | 0.00408 | Up         | -                 | uncharacterized protein LOC8258603                        |
| 29739.t000120 | 2.074  | 1.052  | 0.00000 | Up         | <i>AtbHLH66</i>   | DNA-directed RNA polymerase beta<br>chain, putative       |
| 29739.t000172 | 6.347  | 2.666  | 0.00708 | Up         | -                 | protein LAZ1 homolog 2 isoform X1                         |
| 29747.t000030 | 2.200  | 1.137  | 0.00016 | Up         | -                 | conserved hypothetical protein                            |
| 29747.t000058 | 0.343  | -1.544 | 0.00307 | Down       | -                 | calmodulin binding protein, putative                      |
| 29751.t000050 | 2.185  | 1.128  | 0.00000 | Up         | <i>AtGSTU7</i>    | glutathione S-transferase U7                              |
| 29751.t000055 | 0.404  | -1.306 | 0.00000 | Down       | <i>AtGSTU7</i>    | glutathione S-transferase U7                              |
| 29751.t000085 | 6.076  | 2.603  | 0.00000 | Up         | <i>AtPP2C03</i>   | protein phosphatase 2c, putative                          |
| 29753.t000013 | 2.320  | 1.214  | 0.01654 | Up         | -                 | conserved hypothetical protein                            |
| 29757.t000029 | 88.062 | 6.460  | 0.00000 | Up         | -                 | conserved hypothetical protein                            |
| 29757.t000038 | 0.230  | -2.121 | 0.00000 | Down       | -                 | conserved hypothetical protein                            |
| 29761.t000013 | 2.189  | 1.130  | 0.00000 | Up         | -                 | hydrolase, hydrolyzing O-glycosyl<br>compounds, putative  |
| 29780.t000063 | 3.204  | 1.680  | 0.00000 | Up         | -                 | non-specific lipid-transfer protein 4.1                   |
| 29780.t000072 | 0.229  | -2.124 | 0.00000 | Down       | -                 | aldo-keto reductase, putative                             |
| 29783.t000016 | 5.127  | 2.358  | 0.00000 | Up         | -                 | uncharacterized protein DDB_G0282077                      |
| 29785.t000013 | 2.268  | 1.181  | 0.00111 | Up         | <i>NC2-alpha</i>  | dr1-associated corepressor                                |
| 29788.t000008 | 2.702  | 1.434  | 0.00000 | Up         | -                 | 12S seed storage globulin 1                               |
| 29788.t000021 | 0.331  | -1.595 | 0.00372 | Down       | <i>Gamma-TIP3</i> | aquaporin TIP1-3                                          |
| 29792.t000014 | 2.351  | 1.234  | 0.00000 | Up         | -                 | probable E3 ubiquitin-protein ligase<br>XERICO            |
| 29792.t000018 | 0.421  | -1.249 | 0.00000 | Down       | -                 | Alpha-L-fucosidase 2 precursor, putative                  |
| 29792.t000019 | 0.223  | -2.168 | 0.00000 | Down       | -                 | Alpha-L-fucosidase 2 precursor, putative                  |
| 29794.t000038 | 0.347  | -1.528 | 0.00000 | Down       | -                 | pollen-specific protein SF21                              |
| 29794.t000071 | 5.449  | 2.446  | 0.04160 | Up         | <i>BnIII</i>      | Oleosin, putative                                         |
| 29794.t000085 | 2.786  | 1.478  | 0.00000 | Up         | -                 | Protein pim1, putative                                    |
| 29794.t000108 | 2.885  | 1.528  | 0.02552 | Up         | -                 | Histidine-containing phosphotransfer<br>protein, putative |
| 29801.t000139 | 0.474  | -1.076 | 0.01712 | Down       | -                 | protein PLANT CADMIUM<br>RESISTANCE 2                     |
| 29804.t000064 | 0.178  | -2.487 | 0.00000 | Down       | <i>AtOPT4</i>     | oligopeptide transporter 4                                |
| 29806.t000002 | 0.198  | -2.335 | 0.01478 | Down       | <i>DcPSKRI</i>    | phytosulfokine receptor 1                                 |
| 29807.t000010 | 0.310  | -1.692 | 0.00000 | Down       | -                 | conserved hypothetical protein                            |

Table S2 (continued)

| Gene ID       | FC     | log2FC     | pValue  | Regulation | Gene_symbol      | Description                                                   |
|---------------|--------|------------|---------|------------|------------------|---------------------------------------------------------------|
| 29810.t000003 | 3.822  | 1.934      | 0.00003 | Up         | -                | E3 ubiquitin-protein ligase ATL31                             |
| 29813.t000070 | 6.783  | 2.762      | 0.00001 | Up         | -                | cytochrome P450 704B1                                         |
| 29815.t000004 | 3.902  | 1.964      | 0.00000 | Up         | -                | GD5L esterase/lipase At5g03820                                |
| 29815.t000032 | 6.390  | 2.676      | 0.00000 | Up         | -                | cytochrome P450 76A1                                          |
| 29820.t000023 | 0.222  | -2.170     | 0.00000 | Down       | -                | abscisic acid receptor PYL4                                   |
| 29822.t000169 | 5.139  | 2.362      | 0.00000 | Up         | -                | conserved hypothetical protein                                |
| 29825.t000015 | 2.753  | 1.461      | 0.00001 | Up         | -                | DUF21 domain-containing protein                               |
| 29827.t000092 | 0.007  | -7.096     | 0.00000 | Down       | -                | At2g14520 isoform X2                                          |
| 29827.t000113 | 3.388  | 1.761      | 0.00011 | Up         | -                | transferase, putative                                         |
| 29830.t000067 | 2.447  | 1.291      | 0.00000 | Up         | -                | conserved hypothetical protein                                |
| 29836.t000002 | 5.811  | 2.539      | 0.00000 | Up         | -                | conserved hypothetical protein                                |
| 29836.t000015 | 2.714  | 1.440      | 0.00153 | Up         | <i>ATP-PFK 2</i> | phosphofructokinase, putative                                 |
| 29838.t000086 | 0.000  | #NAM<br>E? | 0.00860 | Down       | -                | conserved hypothetical protein                                |
| 29841.t000023 | 0.384  | -1.381     | 0.00000 | Down       | -                | gibberellin 3-beta hydroxylase, putative                      |
| 29841.t000070 | 8.410  | 3.072      | 0.00576 | Up         | -                | late embryogenesis abundant protein D-7                       |
| 29841.t000092 | 2.314  | 1.211      | 0.00000 | Up         | -                | metallothiol transferase FosB                                 |
| 29841.t000117 | 29.047 | 4.860      | 0.00005 | Up         | -                | aspartate, glycine, lysine and serine-rich protein            |
| 29841.t000174 | 0.203  | -2.302     | 0.00000 | Down       | -                | arsenite transport protein, putative                          |
| 29842.t000053 | 0.475  | -1.074     | 0.00000 | Down       | -                | aspartic proteinase                                           |
| 29842.t000126 | 0.462  | -1.113     | 0.00481 | Down       | <i>AtBGLU47</i>  | beta-glucosidase 46 isoform X1                                |
| 29844.t000021 | 0.409  | -1.290     | 0.00000 | Down       | -                | auxin-responsive protein IAA4                                 |
| 29844.t000033 | 0.210  | -2.249     | 0.03291 | Down       | <i>KCS-20</i>    | acyltransferase, putative                                     |
| 29844.t000045 | 2.482  | 1.311      | 0.00333 | Up         | -                | vegetative cell wall protein gp1                              |
| 29844.t000054 | 3.068  | 1.617      | 0.01518 | Up         | -                | putative calcium-transporting ATPase 13, plasma membrane-type |
| 29844.t000066 | 2.514  | 1.330      | 0.03051 | Up         | <i>ELIP</i>      | early light-induced protein, chloroplastic                    |
| 29851.t000069 | 2.270  | 1.183      | 0.00000 | Up         | -                | uncharacterized protein LOC8279516 isoform X1                 |
| 29851.t000118 | 2.298  | 1.200      | 0.02720 | Up         | -                | uncharacterized WD repeat-containing protein all2124          |
| 29851.t000125 | 2.800  | 1.486      | 0.00000 | Up         | -                | conserved hypothetical protein                                |
| 29851.t000145 | 2.029  | 1.021      | 0.02130 | Up         | <i>AtCBP1</i>    | conserved hypothetical protein                                |
| 29863.t000015 | 0.270  | -1.888     | 0.00000 | Down       | <i>AtCesA2</i>   | cellulose synthase A catalytic subunit 5 [UDP-forming]        |
| 29864.t000073 | 0.391  | -1.356     | 0.00048 | Down       | -                | cytokinin riboside 5'-monophosphate phosphoribohydrolase LOG1 |
| 29869.t000041 | 6.955  | 2.798      | 0.00000 | Up         | <i>AtHsp22.0</i> | 22.7 kDa class IV heat shock protein                          |
| 29877.t000013 | 2.545  | 1.348      | 0.00000 | Up         | <i>AtHIP23</i>   | heavy metal-associated isoprenylated plant protein 26         |

Table S2 (continued)

| Gene ID       | FC     | log2FC | pValue  | Regulation | Gene_symbol      | Description                                        |
|---------------|--------|--------|---------|------------|------------------|----------------------------------------------------|
| 29878.t000010 | 0.401  | -1.319 | 0.02477 | Down       | -                | conserved hypothetical protein                     |
| 29883.t000047 | 0.403  | -1.311 | 0.00011 | Down       | -                | auxin-induced protein 22E                          |
| 29889.t000030 | 0.273  | -1.871 | 0.00000 | Down       | -                | uncharacterized protein LOC8258783                 |
| 29889.t000044 | 3.588  | 1.843  | 0.00367 | Up         | <i>AtbZIP1</i>   | Ocs element-binding factor, putative               |
| 29889.t000095 | 2.327  | 1.219  | 0.00616 | Up         | -                | enzyme inhibitor, putative                         |
| 29889.t000096 | 2.045  | 1.032  | 0.00011 | Up         | <i>AtC/NIF1</i>  | cell wall / vacuolar inhibitor of fructosidase 1   |
| 29889.t000116 | 2.098  | 1.069  | 0.00025 | Up         | -                | transcription factor MYB108                        |
| 29895.t000004 | 2.908  | 1.540  | 0.00000 | Up         | <i>ADF</i>       | actin-depolymerizing factor                        |
| 29895.t000011 | 8.364  | 3.064  | 0.00000 | Up         | -                | conserved hypothetical protein                     |
| 29898.t000003 | 0.346  | -1.533 | 0.00000 | Down       | -                | probable pectate lyase 13                          |
| 29900.t000034 | 0.457  | -1.131 | 0.00001 | Down       | <i>OsNCL2</i>    | calmodulin, putative                               |
| 29900.t000061 | 0.424  | -1.237 | 0.00001 | Down       | -                | protein CHUP1, chloroplastic                       |
| 29900.t000076 | 16.084 | 4.008  | 0.00033 | Up         | -                | uncharacterized protein LOC8259230                 |
| 29900.t000079 | 0.357  | -1.484 | 0.00342 | Down       | <i>AtHIP28</i>   | copper ion binding protein, putative               |
| 29901.t000011 | 0.274  | -1.868 | 0.01938 | Down       | -                | cytochrome P450, putative                          |
| 29904.t000112 | 10.680 | 3.417  | 0.01047 | Up         | -                | uncharacterized PE-PGRS family protein PE_PGRS46   |
| 29907.t000020 | 0.343  | -1.543 | 0.01288 | Down       | -                | conserved hypothetical protein                     |
| 29907.t000033 | 0.458  | -1.126 | 0.00091 | Down       | <i>AtOPR1</i>    | 12-oxophytodienoate reductase opr, putative        |
| 29908.t000032 | 3.366  | 1.751  | 0.00000 | Up         | <i>AtHIP24</i>   | metal ion binding protein, putative                |
| 29908.t000100 | 0.268  | -1.900 | 0.01608 | Down       | <i>GjUGT2</i>    | 7-deoxyloganetin glucosyltransferase               |
| 29908.t000108 | 2.297  | 1.200  | 0.00617 | Up         | -                | protein EXORDIUM                                   |
| 29908.t000110 | 3.587  | 1.843  | 0.00000 | Up         | -                | protein EXORDIUM-like 2                            |
| 29912.t000073 | 0.118  | -3.079 | 0.00002 | Down       | <i>AtMIOX4</i>   | inositol oxygenase 4                               |
| 29912.t000151 | 0.379  | -1.401 | 0.00001 | Down       | -                | dipeptidase, putative                              |
| 29912.t000165 | 0.445  | -1.167 | 0.04070 | Down       | <i>AtDTX51</i>   | protein DETOXIFICATION 52                          |
| 29912.t000219 | 3.140  | 1.651  | 0.00000 | Up         | -                | sugar transporter, putative                        |
| 29915.t000001 | 2.220  | 1.151  | 0.03361 | Up         | <i>LTP</i>       | non-specific lipid-transfer protein 1              |
| 29916.t000019 | 2.001  | 1.001  | 0.00001 | Up         | <i>AtHsp23.6</i> | small heat shock protein, chloroplastic            |
| 29924.t000001 | 0.354  | -1.497 | 0.00000 | Down       | <i>AtBGLU44</i>  | beta-glucosidase 44                                |
| 29929.t000114 | 0.482  | -1.054 | 0.01660 | Down       | -                | ACT domain-containing protein ACR4                 |
| 29929.t000135 | 2.349  | 1.232  | 0.00000 | Up         | -                | uncharacterized protein LOC8286778                 |
| 29933.t000025 | 0.145  | -2.782 | 0.00330 | Down       | <i>atDjC76</i>   | heat shock protein binding protein, putative       |
| 29933.t000061 | 2.499  | 1.322  | 0.00000 | Up         | <i>AtMYB102</i>  | r2r3-myb transcription factor, putative            |
| 29933.t000062 | 21.513 | 4.427  | 0.00000 | Up         | -                | phosphatidylethanolamine-binding protein, putative |
| 29933.t000068 | 0.351  | -1.512 | 0.00000 | Down       | <i>AtENT3</i>    | equilibrative nucleotide transporter 3             |
| 29933.t000069 | 0.438  | -1.190 | 0.00000 | Down       | -                | uncharacterized protein LOC8275382                 |
| 29948.t000018 | 0.440  | -1.184 | 0.00002 | Down       | -                | endoglucanase 11                                   |

Table S2 (continued)

| Gene ID       | FC     | log2FC | pValue  | Regulation | Gene_symbol                                                  | Description                                                       |
|---------------|--------|--------|---------|------------|--------------------------------------------------------------|-------------------------------------------------------------------|
| 29983.t000020 | 2.010  | 1.007  | 0.00000 | Up         | -                                                            | nucleic acid binding protein, putative                            |
|               |        |        |         |            | <i>Arabidopsis</i>                                           |                                                                   |
| 29983.t000080 | 0.338  | -1.565 | 0.00000 | Down       | <i>thaliana</i><br><i>lectin-receptor</i><br><i>kinase d</i> | probable L-type lectin-domain containing<br>receptor kinase VII.2 |
| 29983.t000126 | 2.003  | 1.002  | 0.03009 | Up         | <i>AtERF53</i>                                               | ethylene-responsive transcription factor<br>ERF054                |
| 29983.t000156 | 0.472  | -1.084 | 0.00600 | Down       | -                                                            | formimidoyltransferase-cyclodeaminase<br>isoform X3               |
| 29993.t000017 | 0.411  | -1.284 | 0.00000 | Down       | -                                                            | probable galacturonosyltransferase 15                             |
| 29993.t000024 | 2.178  | 1.123  | 0.01104 | Up         | <i>At-XTH15</i>                                              | xyloglucan<br>endotransglucosylase/hydrolase 2                    |
| 30003.t000020 | 6.008  | 2.587  | 0.00000 | Up         | <i>(1-&gt;3)-beta-gl</i><br><i>ucanase</i>                   | Glucan endo-1,3-beta-glucosidase<br>precursor, putative           |
| 30003.t000021 | 2.318  | 1.213  | 0.00253 | Up         | <i>(1-&gt;3)-beta-gl</i><br><i>ucanase</i>                   | glucan endo-1,3-beta-glucosidase                                  |
| 30027.t000020 | 2.138  | 1.096  | 0.00091 | Up         | -                                                            | uncharacterized protein LOC8282436                                |
| 30027.t000022 | 2.877  | 1.524  | 0.03241 | Up         | -                                                            | uncharacterized protein LOC8282438                                |
| 30032.t000010 | 0.359  | -1.476 | 0.00000 | Down       | <i>PRCP</i>                                                  | lysosomal Pro-X carboxypeptidase<br>isoform X1                    |
| 30060.t000022 | 0.290  | -1.787 | 0.00000 | Down       | -                                                            | protein EXORDIUM-like 7                                           |
| 30064.t000028 | 2.100  | 1.070  | 0.00000 | Up         | <i>AtWRKY6</i>                                               | probable WRKY transcription factor 31                             |
| 30068.t000007 | 0.331  | -1.597 | 0.00000 | Down       | <i>AtCslG3</i>                                               | transferase, putative                                             |
| 30068.t000048 | 0.493  | -1.021 | 0.00076 | Down       | <i>AtOPT7</i>                                                | oligopeptide transporter 7                                        |
| 30068.t000068 | 0.111  | -3.172 | 0.01149 | Down       | -                                                            | cytochrome P450 78A9                                              |
| 30073.t000078 | 7.280  | 2.864  | 0.00006 | Up         | -                                                            | bark storage protein A                                            |
| 30074.t000080 | 5.420  | 2.438  | 0.00000 | Up         | -                                                            | conserved hypothetical protein                                    |
| 30076.t000001 | 0.474  | -1.077 | 0.00000 | Down       | -                                                            | uncharacterized protein LOC8265172                                |
| 30076.t000026 | 7.705  | 2.946  | 0.00980 | Up         | <i>S3H DLO1</i>                                              | 1-aminocyclopropane-1-carboxylate<br>oxidase 5                    |
| 30076.t000077 | 11.430 | 3.515  | 0.00000 | Up         | -                                                            | mannan endo-1,4-beta-mannosidase 4                                |
| 30076.t000087 | 0.490  | -1.029 | 0.00000 | Down       | -                                                            | hypothetical protein RCOM_1342140                                 |
| 30076.t000171 | 2.088  | 1.062  | 0.02722 | Up         | <i>AtMYB78</i>                                               | transcription factor MYB108                                       |
| 30076.t000182 | 2.279  | 1.188  | 0.02186 | Up         | <i>AtGPAT3</i>                                               | Glycerol-3-phosphate acyltransferase,<br>putative                 |
| 30076.t000239 | 0.361  | -1.469 | 0.00023 | Down       | <i>AtBXL2</i>                                                | probable beta-D-xylosidase 2                                      |
| 30076.t000266 | 6.246  | 2.643  | 0.00000 | Up         | -                                                            | uncharacterized protein LOC8265165                                |
| 30078.t000023 | 0.301  | -1.732 | 0.00306 | Down       | -                                                            | retinoid-inducible serine<br>carboxypeptidase, putative           |
| 30091.t000001 | 0.416  | -1.267 | 0.00000 | Down       | <i>Ps6OMT</i>                                                | 3'-hydroxy-N-methyl-(S)-coclaurine<br>4'-O-methyltransferase 2    |
| 30099.t000062 | 2.094  | 1.066  | 0.00045 | Up         | -                                                            | uncharacterized protein LOC8268907                                |

Table S2 (continued)

| Gene ID       | FC     | log2FC | pValue  | Regulation | Gene_symbol       | Description                                                |
|---------------|--------|--------|---------|------------|-------------------|------------------------------------------------------------|
| 30099.t000076 | Inf    | Inf    | 0.04929 | Up         | <i>AtEGY3</i>     | probable zinc metallopeptidase EGY3, chloroplastic         |
| 30099.t000103 | 0.487  | -1.038 | 0.00000 | Down       | -                 | serine carboxypeptidase, putative                          |
| 30114.t000003 | 0.433  | -1.208 | 0.00002 | Down       | -                 | putative glutamine amidotransferase YLR126C                |
| 30115.t000049 | 0.218  | -2.196 | 0.00032 | Down       | -                 | uncharacterized protein LOC8270745                         |
| 30116.t000010 | 2.729  | 1.449  | 0.00001 | Up         | -                 | Basic blue protein, putative                               |
| 30116.t000011 | 2.892  | 1.532  | 0.00231 | Up         | -                 | conserved hypothetical protein                             |
| 30128.t000001 | 0.381  | -1.393 | 0.02673 | Down       | <i>AtDUF7</i>     | uncharacterized protein LOC8285676 isoform X2              |
| 30128.t000039 | 0.309  | -1.696 | 0.00037 | Down       | <i>AtHAK1</i>     | Potassium transporter, putative                            |
| 30128.t000040 | 0.327  | -1.611 | 0.00002 | Down       | <i>AtHAK1</i>     | Potassium transporter, putative                            |
| 30128.t000181 | 0.498  | -1.006 | 0.00002 | Down       | -                 | uncharacterized protein LOC8285509                         |
| 30128.t000370 | 5.131  | 2.359  | 0.00000 | Up         | -                 | nicotianamine synthase                                     |
| 30128.t000417 | 3.330  | 1.736  | 0.00000 | Up         | -                 | histone chaperone ASF1                                     |
| 30128.t000505 | 2.831  | 1.501  | 0.00000 | Up         | -                 | GEM-like protein 5                                         |
| 30129.t000022 | 9.428  | 3.237  | 0.00000 | Up         | <i>AtTSPO</i>     | translocator protein homolog                               |
| 30130.t000009 | 0.369  | -1.437 | 0.00867 | Down       | -                 | phototropin-1                                              |
| 30131.t000021 | 0.309  | -1.693 | 0.03718 | Down       | -                 | conserved hypothetical protein                             |
| 30131.t000022 | 0.485  | -1.042 | 0.04533 | Down       | -                 | serine-threonine protein kinase, plant-type, putative      |
| 30131.t000160 | 0.326  | -1.617 | 0.00009 | Down       | <i>RcCASPL1F2</i> | RecName: Full=CASP-like protein 1F2,Short=RcCASPL1F2       |
| 30131.t000411 | 0.233  | -2.099 | 0.00320 | Down       | -                 | GEM-like protein 4                                         |
| 30136.t000020 | 6.605  | 2.724  | 0.00292 | Up         | -                 | uncharacterized protein LOC8259126                         |
| 30136.t000048 | Inf    | Inf    | 0.00810 | Up         | -                 | uncharacterized protein LOC8259154                         |
| 30138.t000158 | 3.384  | 1.759  | 0.00750 | Up         | -                 | chaperone protein ClpB1                                    |
| 30138.t000195 | 0.463  | -1.112 | 0.00377 | Down       | <i>AtbHLH72</i>   | DNA binding protein, putative                              |
| 30138.t000233 | 2.582  | 1.369  | 0.00220 | Up         | <i>AtEXPA15</i>   | expansin-A15                                               |
| 30143.t000033 | 2.511  | 1.328  | 0.00000 | Up         | <i>P5CS</i>       | delta-1-pyrroline-5-carboxylate synthase                   |
| 30143.t000059 | 2.056  | 1.040  | 0.00000 | Up         | -                 | uncharacterized protein LOC8287504                         |
| 30146.t000007 | 2.043  | 1.031  | 0.01385 | Up         | -                 | conserved hypothetical protein                             |
| 30146.t000011 | 2.539  | 1.345  | 0.00000 | Up         | -                 | hypothetical protein RCOM_1485780                          |
| 30146.t000085 | 2.284  | 1.192  | 0.02022 | Up         | -                 | histidine-containing phosphotransfer protein 4             |
| 30147.t000015 | 21.781 | 4.445  | 0.00000 | Up         | -                 | hypothetical protein RCOM_1496000                          |
| 30147.t000045 | 4.806  | 2.265  | 0.00017 | Up         | -                 | uncharacterized protein LOC8266341                         |
| 30147.t000145 | 2.618  | 1.388  | 0.03757 | Up         | -                 | C2 and GRAM domain-containing protein At5g50170 isoform X1 |
| 30147.t000391 | 2.420  | 1.275  | 0.00244 | Up         | -                 | Phytochrome kinase substrate, putative                     |
| 30147.t000507 | 2.542  | 1.346  | 0.00090 | Up         | -                 | conserved hypothetical protein                             |
| 30147.t000584 | 3.753  | 1.908  | 0.00052 | Up         | <i>DREB1A</i>     | dehydration-responsive element                             |

Table S2 (continued)

| Gene ID       | FC     | log2FC | pValue  | Regulation | Gene_symbol                               | Description                                                                |
|---------------|--------|--------|---------|------------|-------------------------------------------|----------------------------------------------------------------------------|
| 30147.t000595 | 2.421  | 1.276  | 0.00000 | Up         | -                                         | conserved hypothetical protein                                             |
| 30147.t000657 | 8.314  | 3.056  | 0.00000 | Up         | -                                         | uncharacterized protein LOC8277423                                         |
| 30147.t000725 | 2.281  | 1.190  | 0.00047 | Up         | -                                         | calmodulin binding protein, putative                                       |
| 30147.t000754 | Inf    | Inf    | 0.00132 | Up         | -                                         | MADS-box transcription factor, putative                                    |
| 30147.t000803 | 0.411  | -1.282 | 0.00000 | Down       | -                                         | leucine-rich repeat protein, putative                                      |
| 30156.t000039 | 3.055  | 1.611  | 0.00000 | Up         | <i>AtBBX30</i>                            | DNA binding protein, putative                                              |
| 30169.t000292 | 47.248 | 5.562  | 0.00000 | Up         | <i>OsPP2C08</i>                           | probable protein phosphatase 2C 51                                         |
| 30169.t000342 | 2.803  | 1.487  | 0.00005 | Up         | -                                         | G-type lectin S-receptor-like<br>serine/threonine-protein kinase At5g24080 |
| 30169.t000349 | 2.021  | 1.015  | 0.00002 | Up         | -                                         | late embryogenesis abundant protein<br>At1g64065                           |
| 30170.t000054 | 2.406  | 1.267  | 0.01750 | Up         | <i>EPF-like<br/>protein 2</i>             | EPIDERMAL PATTERNING<br>FACTOR-like protein 2                              |
| 30170.t000064 | 5.827  | 2.543  | 0.00000 | Up         | <i>HlBCAT1</i>                            | branched-chain amino acid<br>aminotransferase, putative                    |
| 30170.t000232 | 4.456  | 2.156  | 0.00000 | Up         | -                                         | uncharacterized protein LOC8288554                                         |
| 30170.t000289 | 2.370  | 1.245  | 0.00000 | Up         | -                                         | alpha-amylase                                                              |
| 30170.t000298 | 0.338  | -1.567 | 0.00036 | Down       | -                                         | conserved hypothetical protein                                             |
| 30170.t000370 | 3.692  | 1.884  | 0.00000 | Up         | -                                         | cytochrome P450 CYP82D47                                                   |
| 30170.t000474 | 2.770  | 1.470  | 0.00166 | Up         | -                                         | uncharacterized protein LOC8288949                                         |
| 30170.t000484 | 0.324  | -1.625 | 0.02904 | Down       | <i>DFR</i>                                | dihydroflavonol-4-reductase                                                |
| 30170.t000491 | 0.074  | -3.761 | 0.04889 | Down       | -                                         | jasmonate O-methyltransferase                                              |
| 30170.t000565 | 3.397  | 1.764  | 0.01131 | Up         | -                                         | cytochrome P450 83B1                                                       |
| 30170.t000594 | 2.233  | 1.159  | 0.00055 | Up         | -                                         | conserved hypothetical protein                                             |
| 30170.t000619 | 0.381  | -1.392 | 0.00000 | Down       | -                                         | cytochrome P450 81E8                                                       |
| 30170.t000624 | 0.321  | -1.639 | 0.02480 | Down       | -                                         | putative receptor protein kinase ZmPK1                                     |
| 30170.t000692 | 3.095  | 1.630  | 0.00000 | Up         | -                                         | E3 ubiquitin-protein ligase ATL23                                          |
| 30170.t000693 | 6.670  | 2.738  | 0.00000 | Up         | <i>OsNrx2</i>                             | probable nucleoredoxin 2 isoform X4                                        |
| 30170.t000710 | 0.282  | -1.829 | 0.02288 | Down       | <i>ODC</i>                                | ornithine decarboxylase                                                    |
| 30170.t000711 | 0.343  | -1.543 | 0.00035 | Down       | <i>ODC</i>                                | ornithine decarboxylase isoform X1                                         |
| 30170.t000771 | 2.674  | 1.419  | 0.00000 | Up         | -                                         | starch branching enzyme II, putative                                       |
| 30170.t000790 | 0.494  | -1.016 | 0.00000 | Down       | -                                         | calcium lipid binding protein, putative                                    |
| 30174.t000076 | 0.471  | -1.086 | 0.00000 | Down       | <i>Sphingoid<br/>LCB<br/>desaturase 2</i> | delta(8)-fatty-acid desaturase 2                                           |
| 30174.t000082 | 3.735  | 1.901  | 0.00281 | Up         | -                                         | BAG family molecular chaperone<br>regulator 6                              |
| 30174.t000125 | 3.543  | 1.825  | 0.00000 | Up         | <i>BnIII</i>                              | oleosin 1                                                                  |
| 30174.t000270 | 2.068  | 1.048  | 0.00000 | Up         | -                                         | leucine rich repeat receptor kinase,<br>putative                           |
| 30174.t000472 | 5.050  | 2.336  | 0.00000 | Up         | -                                         | conserved hypothetical protein                                             |

**Table S2 (continued)**

| Gene ID       | FC     | log2FC | pValue  | Regulation | Gene_symbol     | Description                                                            |
|---------------|--------|--------|---------|------------|-----------------|------------------------------------------------------------------------|
| 30174.t000550 | 2.452  | 1.294  | 0.00000 | Up         | <i>POMGnT2</i>  | glycosyltransferase, putative                                          |
| 30179.t000016 | 0.116  | -3.112 | 0.00000 | Down       | -               | serine-threonine protein kinase,<br>plant-type, putative<br>xyloglucan |
| 30179.t000018 | 4.175  | 2.062  | 0.00001 | Up         | <i>At-XTH22</i> | endotransglucosylase/hydrolase protein<br>22                           |
| 30179.t000025 | 2.891  | 1.532  | 0.01446 | Up         | <i>At-XTH25</i> | xyloglucan:xyloglucosyl transferase,<br>putative                       |
| 30183.t000014 | 2.890  | 1.531  | 0.00001 | Up         | <i>OC-X</i>     | cysteine proteinase inhibitor 5                                        |
| 30190.t000051 | 2.045  | 1.032  | 0.01712 | Up         | -               | hypothetical protein RCOM_1691440                                      |
| 30190.t000145 | 0.436  | -1.199 | 0.02524 | Down       | -               | anthocyanidin 3-O-glucosyltransferase                                  |
| 30190.t000196 | 0.472  | -1.082 | 0.00000 | Down       | -               | uncharacterized protein LOC8271767                                     |
| 30190.t000213 | 45.219 | 5.499  | 0.00000 | Up         | -               | uncharacterized protein LOC8271784                                     |
| 30190.t000497 | 2.899  | 1.536  | 0.00000 | Up         | -               | conserved hypothetical protein                                         |
| 30190.t000498 | 4.045  | 2.016  | 0.00000 | Up         | <i>GenCHYB</i>  | beta-carotene 3-hydroxylase,<br>chloroplastic isoform X1               |
| 30190.t000545 | 2.349  | 1.232  | 0.00009 | Up         | <i>DROJ1</i>    | dnaJ homolog subfamily B member 13                                     |
| 30190.t000559 | 0.486  | -1.041 | 0.00000 | Down       | <i>AtERF12</i>  | ethylene-responsive transcription factor<br>12                         |
| 30204.t000008 | 2.273  | 1.184  | 0.00148 | Up         | -               | uncharacterized protein LOC8264934<br>isoform X1                       |
| 30226.t000067 | 2.130  | 1.091  | 0.00013 | Up         | <i>AtXYLP9</i>  | lipid binding protein, putative                                        |
| 33363.t000001 | 2.013  | 1.010  | 0.00000 | Up         | -               | aldehyde dehydrogenase family 7<br>member B4                           |
| 38153.t000001 | 2.058  | 1.042  | 0.02153 | Up         | -               | conserved hypothetical protein, partial                                |
| 49862.t000001 | 6.757  | 2.756  | 0.00000 | Up         | <i>S3H DLO1</i> | Flavonol synthase/flavanone<br>3-hydroxylase, putative, partial        |
| 30174.t000495 | 3.896  | 1.962  | 0.00000 | Up         | <i>ABI5</i>     | ninja-family protein AFP2 isoform X1                                   |

**Table S3.** Up-regulated DEGs involved in starch and sucrose metabolism pathway in the cotyledons of castor under salt stress.

| Gene ID       | FC     | log <sub>2</sub> FoldChange | pValue   | Gene_symbol     | Description                                                                               |
|---------------|--------|-----------------------------|----------|-----------------|-------------------------------------------------------------------------------------------|
| 29585.t000006 | 2.122  | 1.085                       | 0.0001   | <i>UGD</i>      | UDP-glucuronic acid decarboxylase 6                                                       |
| 29630.t000018 | 3.538  | 1.823                       | 0.0001   | -               | alpha-1,4 glucan phosphorylase L isozyme, chloroplastic/amyloplastic isoform X1 (2.4.1.1) |
| 29692.t000011 | 2.811  | 1.491                       | 5.58E-07 | <i>PE 6</i>     | pectinesterase                                                                            |
| 29692.t000012 | 2.099  | 1.069                       | 0.0001   | <i>PGM</i>      | phosphoglucomutase, cytoplasmic (5.4.2.2)                                                 |
| 29783.t000019 | 2.299  | 1.201                       | 7.48E-06 | <i>AtUGlAE3</i> | UDP-glucuronate 4-epimerase 1                                                             |
| 29908.t000058 | 2.858  | 1.515                       | 0.002    | <i>AtTPPD</i>   | probable trehalose-phosphate phosphatase D (3.1.3.12)                                     |
| 29951.t000003 | 15.644 | 3.967                       | 0.0006   | <i>AtSUS6</i>   | sucrose synthase, putative (2.4.1.13)                                                     |
| 29986.t000065 | Inf    | Inf                         | 0.036    | <i>ExoPG</i>    | Exopolygalacturonase clone GBGE184 precursor, putative                                    |
| 30147.t000809 | 4.788  | 2.259                       | 0.013    | CsF26G          | beta-glucosidase, putative (3.2.1.21)                                                     |
| 30170.t000289 | 3.325  | 1.733                       | 0.0001   | -               | alpha-amylase (3.2.1.1)                                                                   |
| 30170.t000721 | 2.747  | 1.458                       | 2.29E-07 | <i>AtAMY2</i>   | alpha-amylase, putative (3.2.1.1)                                                         |
| 30170.t000771 | 2.389  | 1.256                       | 5.89E-06 | -               | starch branching enzyme II, putative (2.4.1.18)                                           |

**Table S4.** Down-regulated DEGs involved in starch and sucrose metabolism pathway in the cotyledons of castor under salt stress.

| Gene ID       | FC    | log <sub>2</sub> FoldChange | pValue   | Gene_symbol     | Description                                                                       |
|---------------|-------|-----------------------------|----------|-----------------|-----------------------------------------------------------------------------------|
| 28629.t000019 | 0.124 | -3.007                      | 0.048    | -               | beta-fructofuranosidase, insoluble isoenzyme 3<br>(3.2.1.26)                      |
| 29308.t000001 | 0.261 | -1.934                      | 0.003    | <i>PE 3</i>     | pectinesterase 3                                                                  |
| 29607.t000001 | 0.490 | -1.028                      | 0.0004   | <i>AtTPSI</i>   | alpha,alpha-trehalose-phosphate synthase<br>[UDP-forming] 1 (2.4.1.15) (3.1.3.12) |
| 29822.t000192 | 0.052 | -4.264                      | 2.37E-37 | <i>CT-BMY</i>   | Beta-amylase, putative (3.2.1.2)                                                  |
| 29842.t000126 | 0.396 | -1.335                      | 0.034    | <i>AtBGLU47</i> | beta-glucosidase 46 isoform X1 (3.2.1.22)                                         |
| 29924.t000001 | 0.411 | -1.280                      | 0.0007   | <i>AtBGLU44</i> | beta-glucosidase 44 (3.2.1.22)                                                    |
| 29993.t000017 | 0.412 | -1.277                      | 0.005    | -               | probable galacturonosyltransferase 15                                             |
| 30026.t000074 | 0.337 | -1.566                      | 0.039    | <i>AtTPSI</i>   | trehalose-6-phosphate synthase, putative (2.4.1.15)<br>(3.1.3.12)                 |
| 30147.t000485 | 0.391 | -1.352                      | 1.58E-06 | <i>AtTPPA</i>   | trehalose-phosphate phosphatase A (3.1.3.12)                                      |
| 30169.t000162 | 0.219 | -2.186                      | 0.0004   | -               | uncharacterized protein LOC8272657 (3.2.1.22)                                     |

**Table S5.** Up-regulated DEGs involved in starch and sucrose metabolism pathway in the roots of castor under salt stress.

| Gene ID       | FC    | log <sub>2</sub> FoldChange | pValue   | Gene_symbol    | Description                                                                             |
|---------------|-------|-----------------------------|----------|----------------|-----------------------------------------------------------------------------------------|
| 29864.t000076 | 4.120 | 2.042                       | 2.51E-10 | <i>AtQRT2</i>  | polygalacturonase QRT2                                                                  |
| 29904.t000160 | 2.400 | 1.263                       | 5.53E-09 | <i>TR-BAMY</i> | beta-amylase 1, chloroplastic (3.2.1.2)                                                 |
| 29986.t000062 | 4.157 | 2.055                       | 3.04E-09 | -              | sucrose synthase, putative (2.4.1.13)                                                   |
| 30042.t000008 | 3.258 | 1.704                       | 6.67E-12 | <i>PG</i>      | polygalacturonase                                                                       |
| 30042.t000010 | 2.879 | 1.525                       | 2.29E-05 | <i>PG</i>      | polygalacturonase                                                                       |
| 30147.t000249 | 2.536 | 1.342                       | 0.0009   | <i>AtTPS9</i>  | probable alpha,alpha-trehalose-phosphate synthase [UDP-forming] 9 (2.4.1.15) (3.1.3.12) |
| 30147.t000480 | 2.039 | 1.028                       | 0.029    | <i>PE 2</i>    | Pectinesterase-2 precursor, putative                                                    |
| 30169.t000163 | 2.526 | 1.336                       | 2.00E-05 | -              | beta-glucosidase 12 (3.2.1.21)                                                          |
| 30170.t000289 | 2.370 | 1.245                       | 4.19E-06 | -              | alpha-amylase (3.2.1.1)                                                                 |
| 30170.t000771 | 2.674 | 1.419                       | 4.37E-17 | -              | starch branching enzyme II, putative (2.4.1.18)                                         |
| 30174.t000244 | 18.42 | 4.203                       | 5.83E-05 | <i>PE 36</i>   | Pectinesterase-2 precursor, putative                                                    |
| 4             |       |                             |          |                |                                                                                         |

**Table S6.** Down-regulated DEGs involved in starch and sucrose metabolism pathway in the roots of castor under salt stress.

| Gene ID       | FC    | log <sub>2</sub> FoldChange | pValue   | Gene_symbol      | Description                                                                    |
|---------------|-------|-----------------------------|----------|------------------|--------------------------------------------------------------------------------|
| 28865.t000001 | 0.485 | -1.043                      | 1.06E-09 | <i>AtCEL3</i>    | endo-1,4-beta-glucanase, putative (3.2.1.4)                                    |
| 29005.t000011 | 0.384 | -1.377                      | 1.66E-11 | -                | glucan endo-1,3-beta-glucosidase 2 (3.2.1.39)                                  |
| 29629.t000093 | 0.399 | -1.323                      | 6.42E-10 | <i>AtUGlcAE2</i> | UDP-glucuronate 5-epimerase, putative                                          |
| 29739.t000105 | 0.449 | -1.152                      | 1.51E-09 | <i>PE U1</i>     | pectinesterase                                                                 |
| 29739.t000107 | 0.097 | -3.354                      | 5.13E-06 | <i>PE U1</i>     | Pectinesterase-3 precursor, putative                                           |
| 29739.t000111 | 0.187 | -2.411                      | 5.74E-13 | <i>PE 12</i>     | probable pectinesterase/pectinesterase inhibitor<br>12                         |
| 29739.t000115 | 0.406 | -1.300                      | 8.47E-08 | <i>PE 54</i>     | pectinesterase                                                                 |
| 29808.t000003 | 0.373 | -1.421                      | 0.004    | -                | beta-glucosidase, putative (3.2.1.21)                                          |
| 29808.t000016 | 0.362 | -1.465                      | 3.20E-13 | <i>AtBGLU17</i>  | beta-glucosidase, putative (3.2.1.21)                                          |
| 29842.t000126 | 0.462 | -1.112                      | 0.004    | <i>AtBGLU47</i>  | beta-glucosidase 46 isoform X1 (3.2.1.21)                                      |
| 29924.t000001 | 0.354 | -1.497                      | 1.55E-13 | <i>AtBGLU44</i>  | beta-glucosidase 44 (3.2.1.21)                                                 |
| 29986.t000060 | 0.243 | -2.039                      | 0.015    | <i>PE 40</i>     | pectinesterase                                                                 |
| 29993.t000017 | 0.410 | -1.283                      | 4.70E-13 | -                | probable galacturonosyltransferase 15                                          |
| 30147.t000484 | 0.496 | -1.009                      | 0.012    | -                | Beta-fructofuranosidase, soluble isoenzyme I<br>precursor, putative (3.2.1.26) |
| 30155.t000027 | 0.246 | -2.020                      | 0.007    | <i>PE 25</i>     | probable pectinesterase/pectinesterase inhibitor<br>25                         |
| 30221.t000012 | 0.304 | -1.714                      | 5.45E-23 | <i>MsXyl2</i>    | beta-xylosidase/alpha-L-arabinofuranosidase 2                                  |
| 30226.t000001 | 0.363 | -1.458                      | 8.48E-17 | <i>AtBGLU17</i>  | beta-glucosidase, putative, partial (3.2.1.21)                                 |
| 30226.t000006 | 0.474 | -1.076                      | 3.84E-12 | <i>VH</i>        | vicianin hydrolase (3.2.1.21)                                                  |

**Table S7.** DEGs involved in protein processing in endoplasmic reticulum pathway in the cotyledons of castor under salt stress.

| Gene ID       | FC     | log <sub>2</sub> FoldChange | pValue   | Gene_symbol       | Description                              |
|---------------|--------|-----------------------------|----------|-------------------|------------------------------------------|
| 27699.t000007 | 2.118  | 1.082                       | 0.004    | <i>AtHsp15.7</i>  | conserved hypothetical protein           |
| 28659.t000004 | 12.109 | 3.598                       | 0.0006   | -                 | class I heat shock protein               |
| 29520.t000005 | 20.122 | 4.330                       | 0.003    | <i>AtHsp18.1</i>  | 18.1 kDa class I heat shock protein      |
| 29520.t000006 | 8.006  | 3.001                       | 0.040    | <i>AtHsp18.1</i>  | 18.1 kDa class I heat shock protein      |
| 29585.t000002 | 3.143  | 1.652                       | 2.50E-09 | <i>AtHsc70-4</i>  | heat shock cognate 70 kDa protein 2      |
| 29610.t000003 | 5.459  | 2.448                       | 2.12E-05 | -                 | 17.3 kDa class I heat shock protein      |
| 29610.t000006 | 9.655  | 3.271                       | 1.09E-10 | <i>OsHsp17.4</i>  | 18.1 kDa class I heat shock protein      |
| 29633.t000030 | 19.629 | 4.294                       | 0.004    | -                 | class I heat shock protein               |
| 29727.t000002 | 4.697  | 2.231                       | 2.42E-06 | <i>AtHsp17.4B</i> | 17.4 kDa class III heat shock protein    |
| 29739.t000024 | 10.476 | 3.389                       | 4.54E-07 | -                 | 17.3 kDa class II heat shock protein     |
| 29751.t000039 | 8.852  | 3.146                       | 2.69E-09 | -                 | heat-shock protein, putative             |
| 29751.t000040 | 2.166  | 1.115                       | 0.0002   | -                 | 18.1 kDa class I heat shock protein      |
| 29751.t000059 | 5.767  | 2.528                       | 0.048    | -                 | 17.3 kDa class I heat shock protein      |
| 29854.t000032 | 3.162  | 1.661                       | 3.88E-09 | -                 | dnaJ protein homolog                     |
| 29869.t000041 | 8.178  | 3.031                       | 4.26E-06 | <i>AtHsp22.0</i>  | 22.7 kDa class IV heat shock protein     |
| 30131.t000031 | 2.582  | 1.368                       | 5.52E-06 | -                 | heat shock 70 kDa protein 5              |
| 30147.t000492 | 6.046  | 2.596                       | 2.19E-14 | <i>AtHsp23.6</i>  | heat shock 22 kDa protein, mitochondrial |
| 30174.t000429 | 3.313  | 1.728                       | 1.09E-06 | -                 | 18.1 kDa class I heat shock protein      |
